# Supplementary material for: Comprehensive Phylogenetic Reconstruction of Amoebozoa Based on Concatenated Analyses of SSU-rDNA and Actin Genes
Source: PubMed Central journal article supplement (PMC3145751; doi:10.1371/journal.pone.0022780), 2011-07-28
Supplement: pone.0022780.s002.pdf [file pone.0022780.s002.pdf]

A

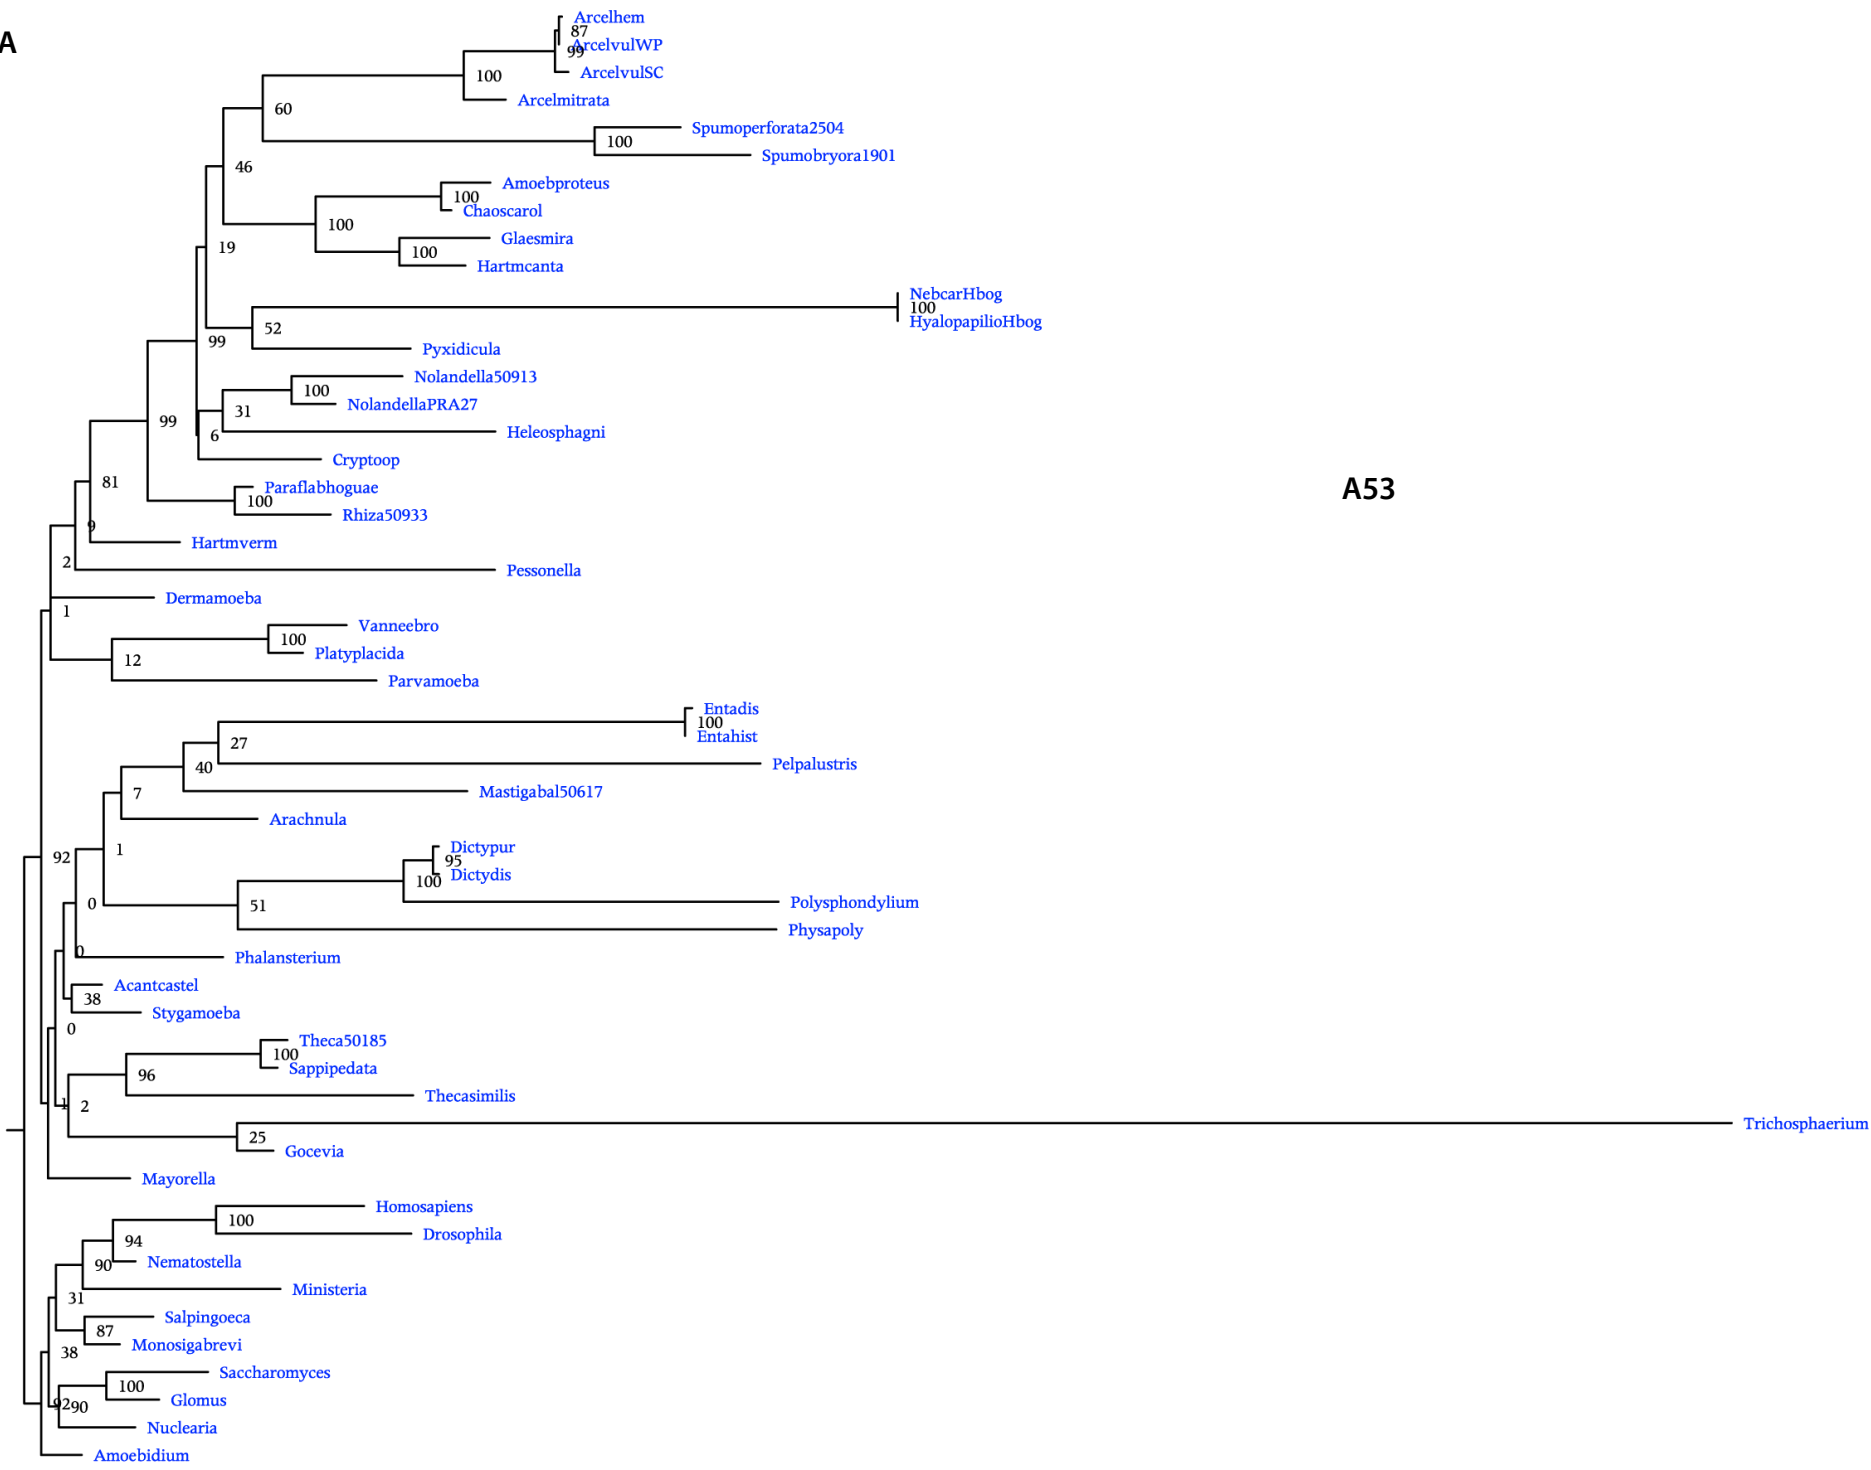

A53

0.08

B

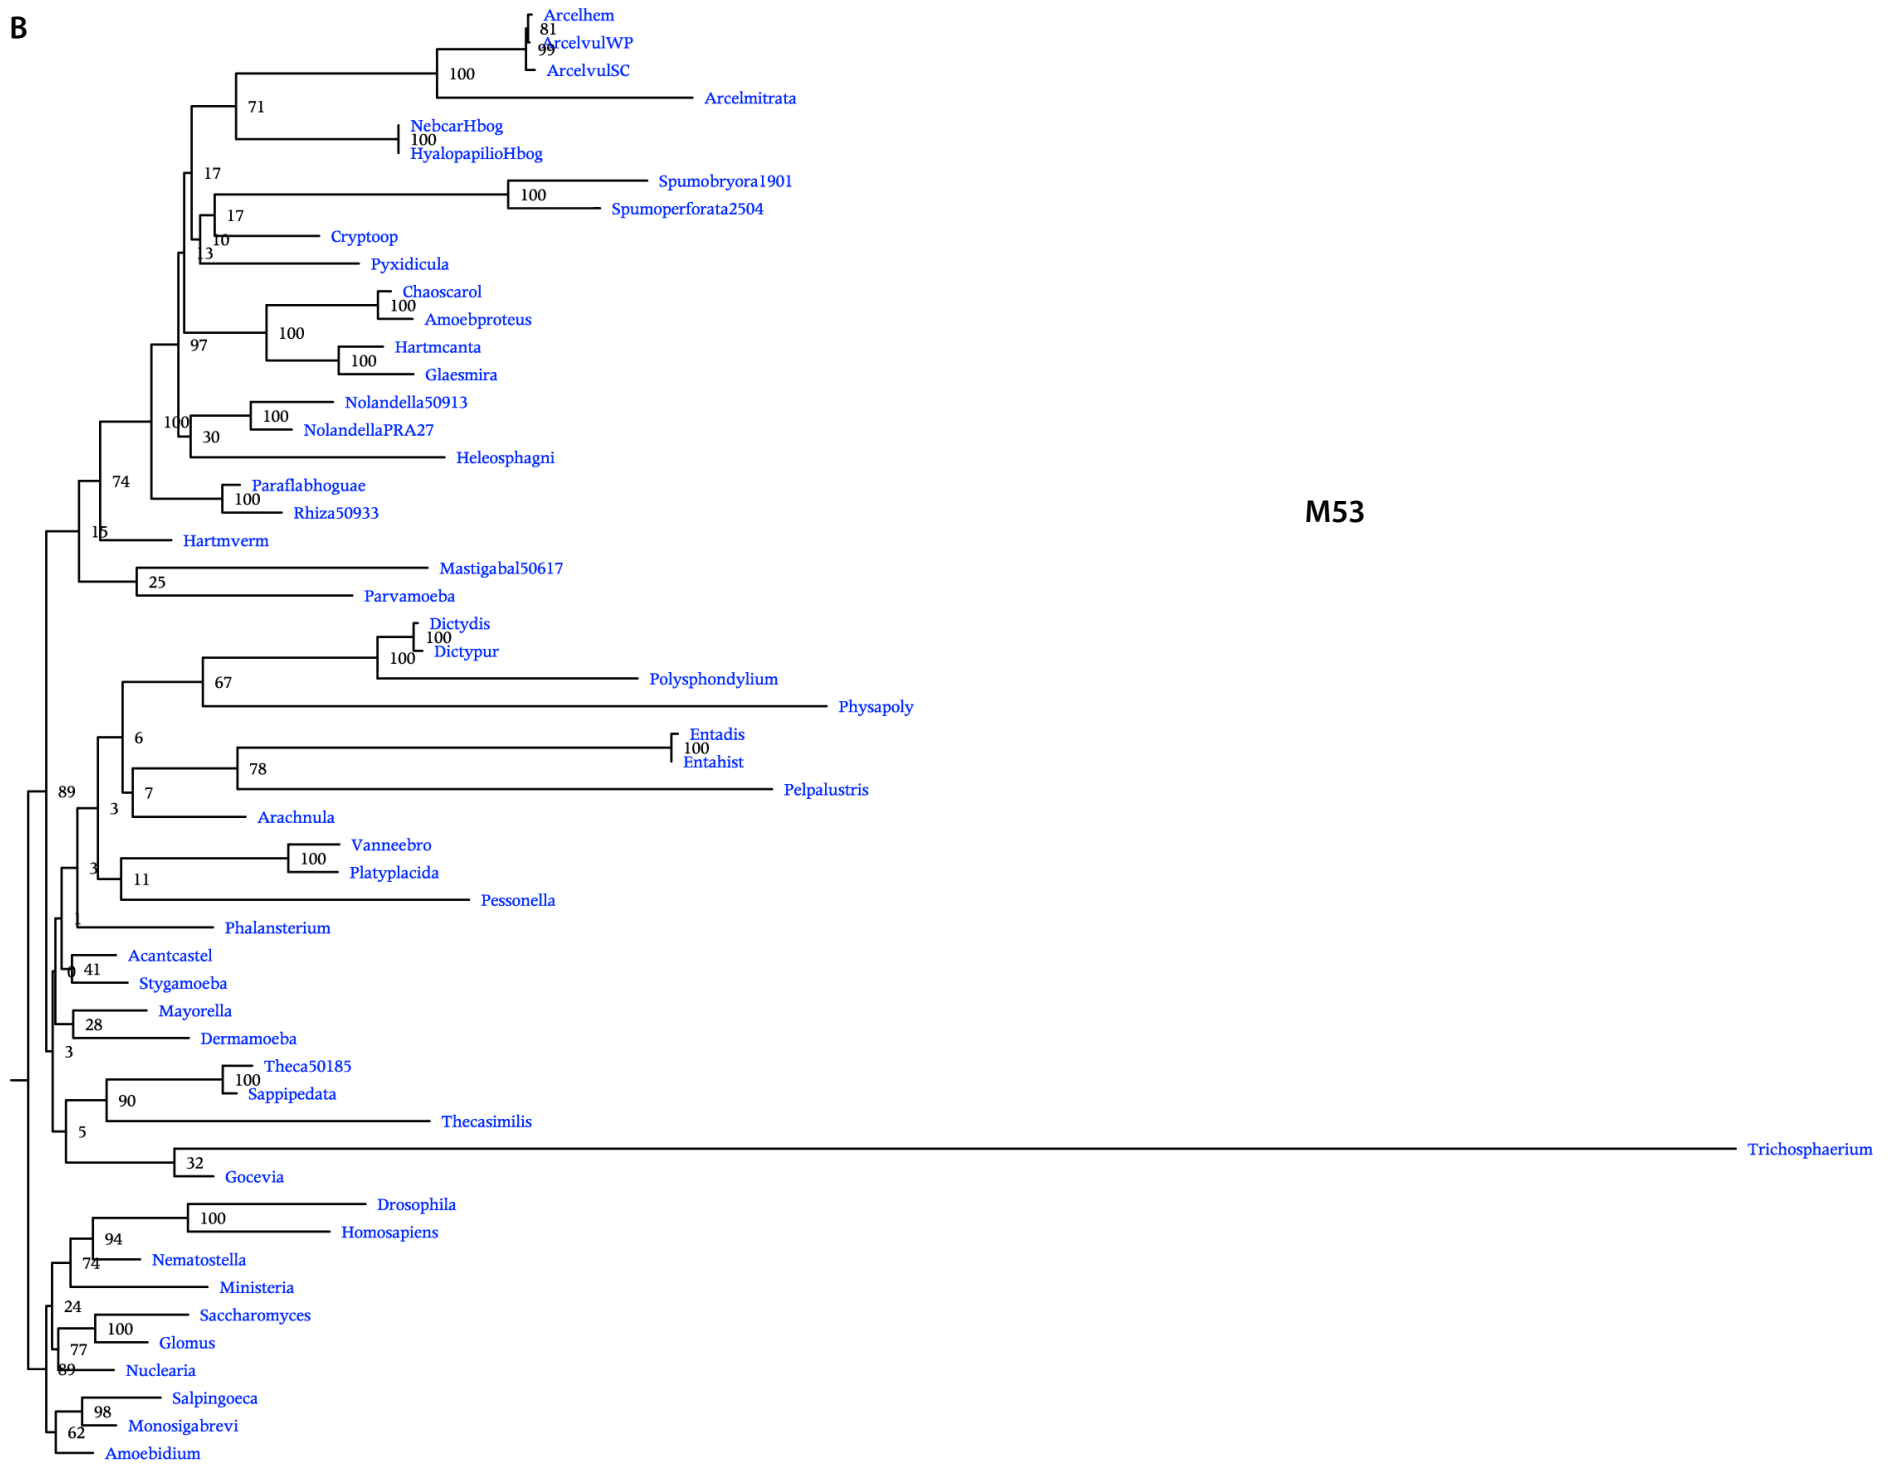

M53

0.2

C

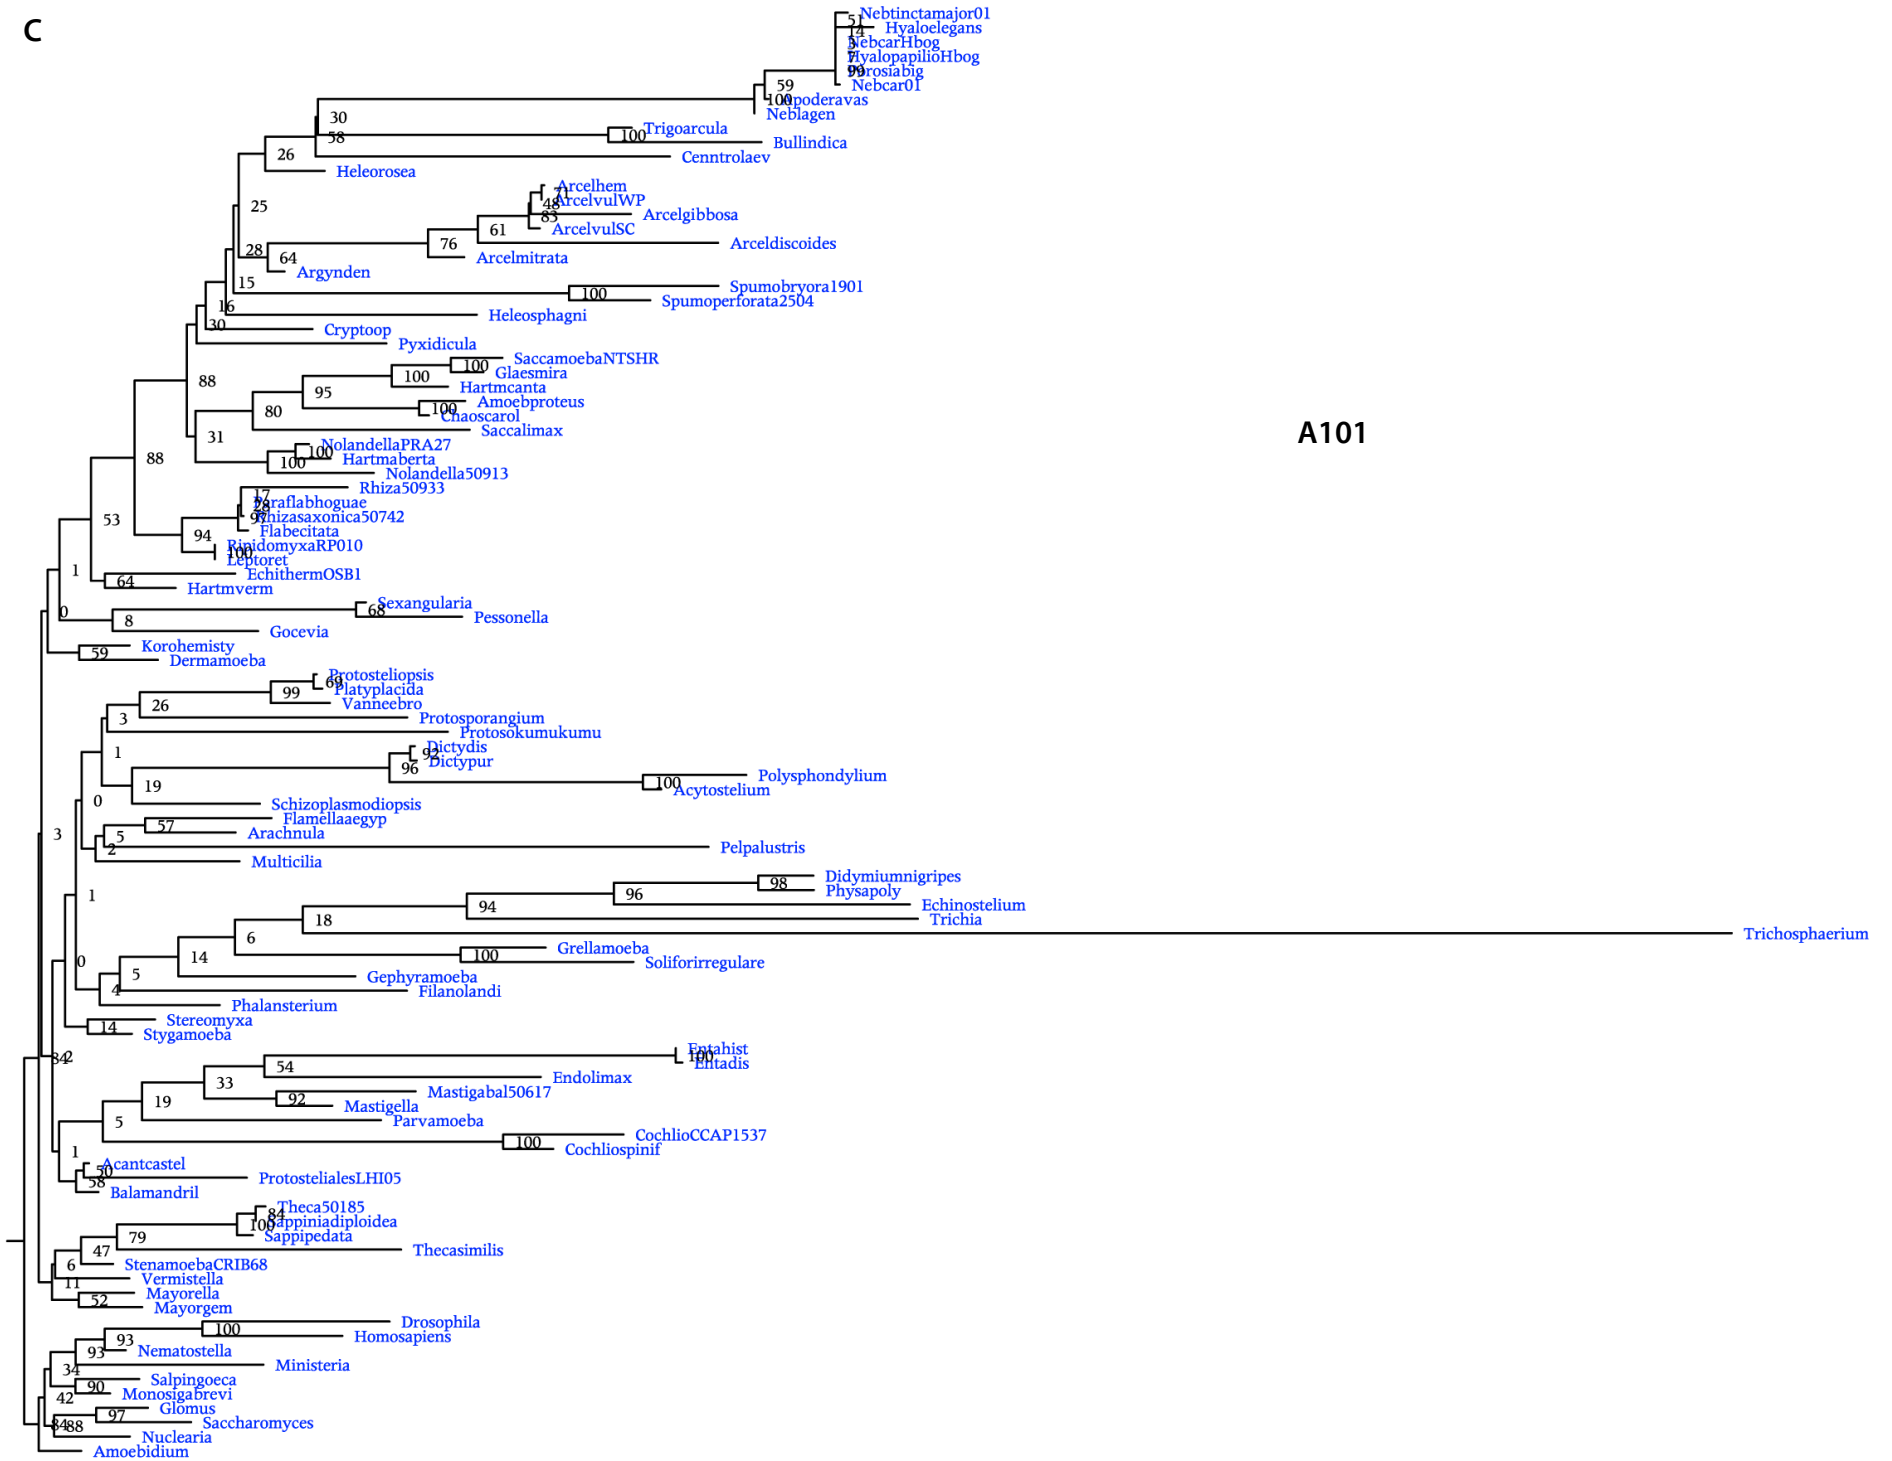

A101

0.09

D

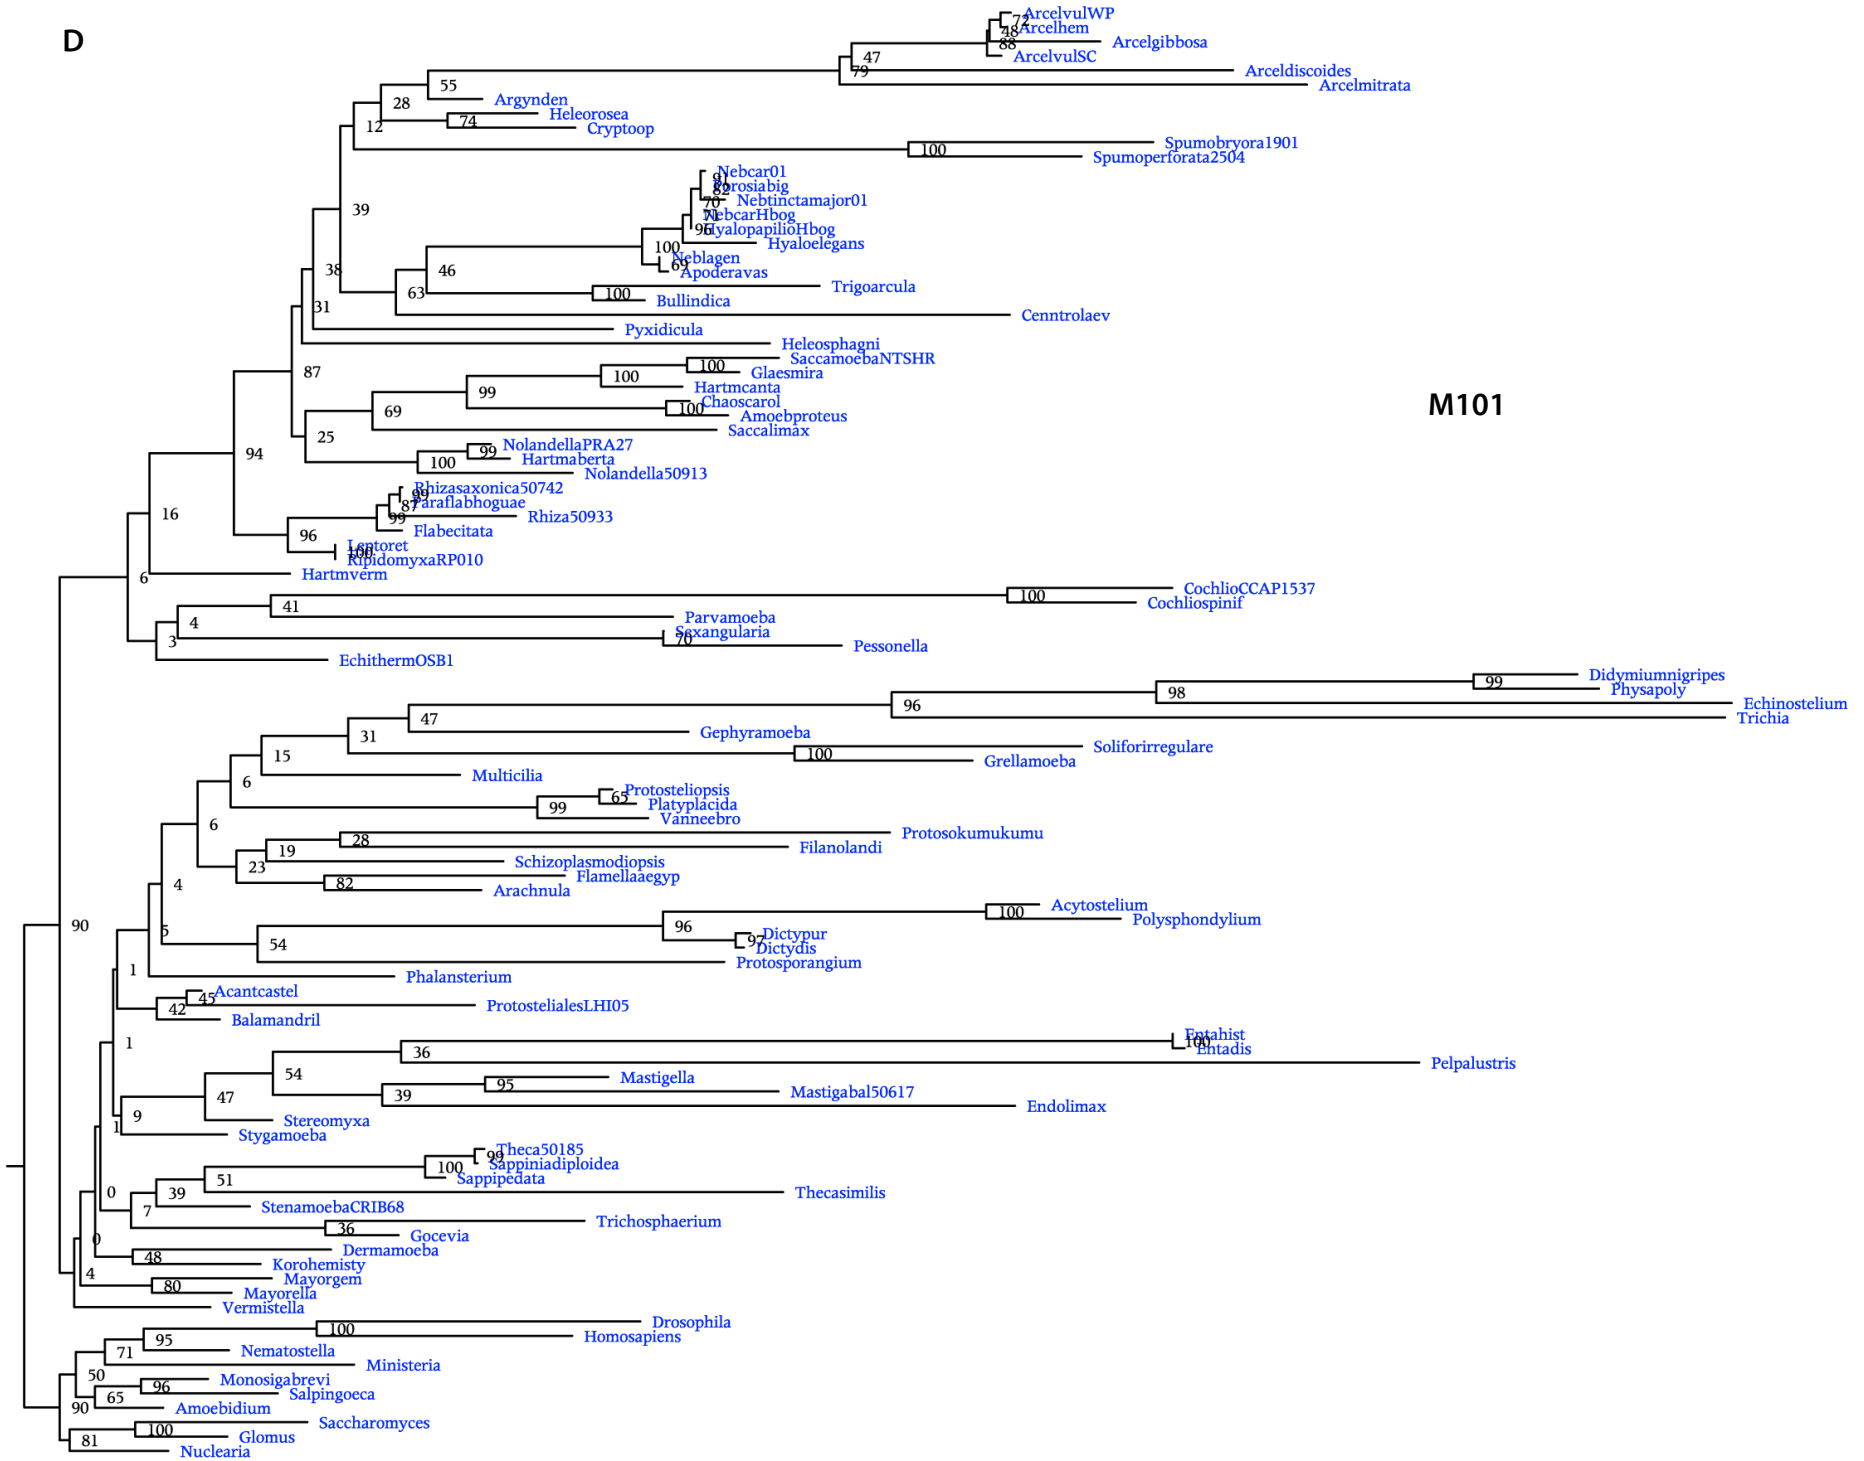

0.07



F

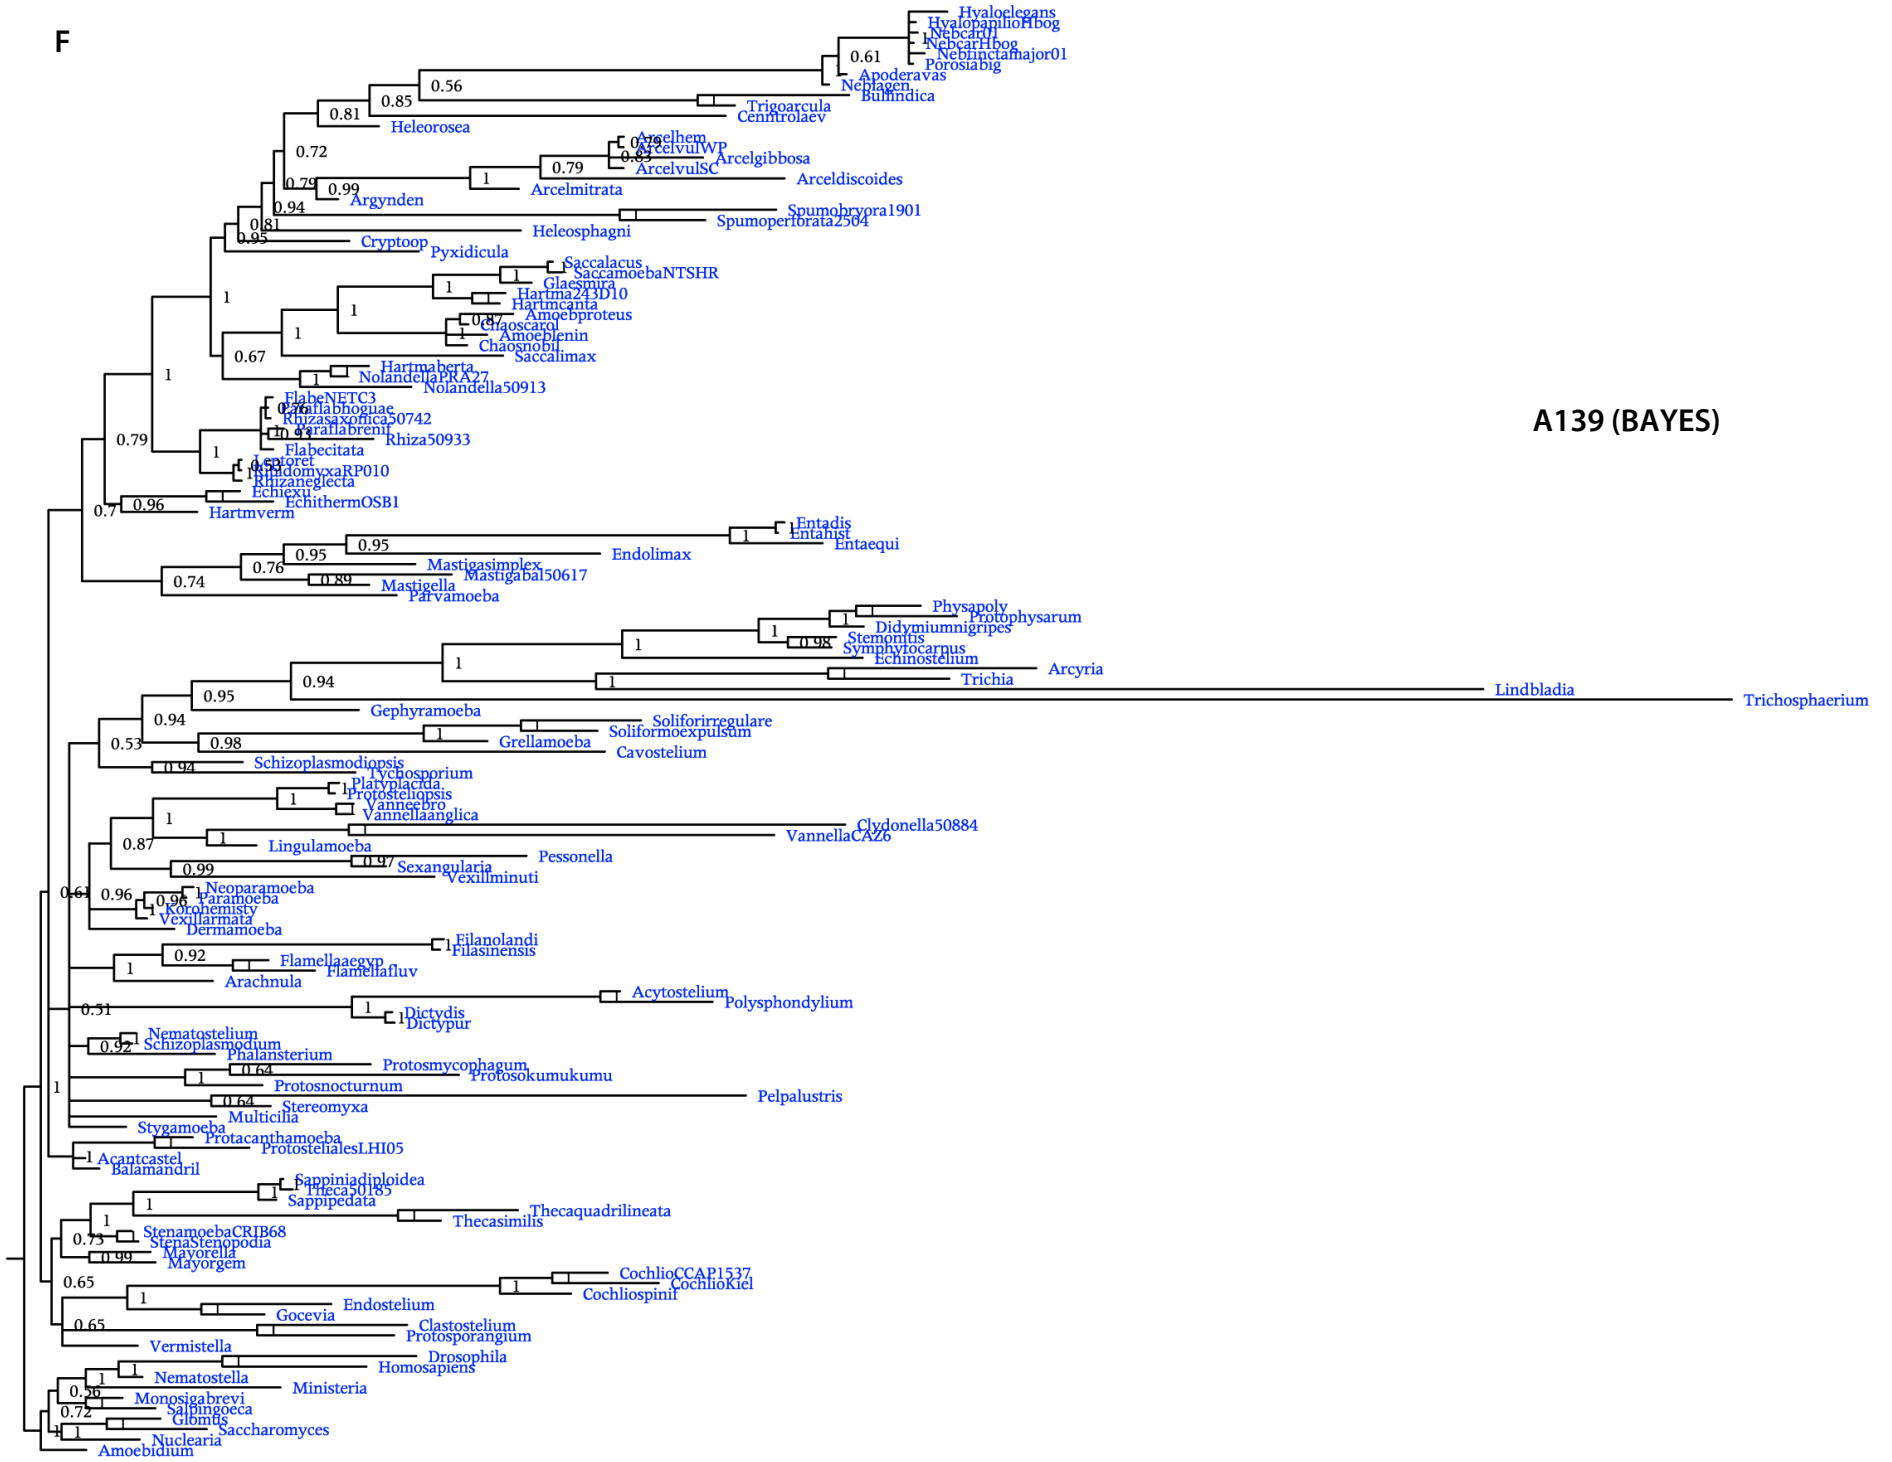

A139 (BAYES)

G

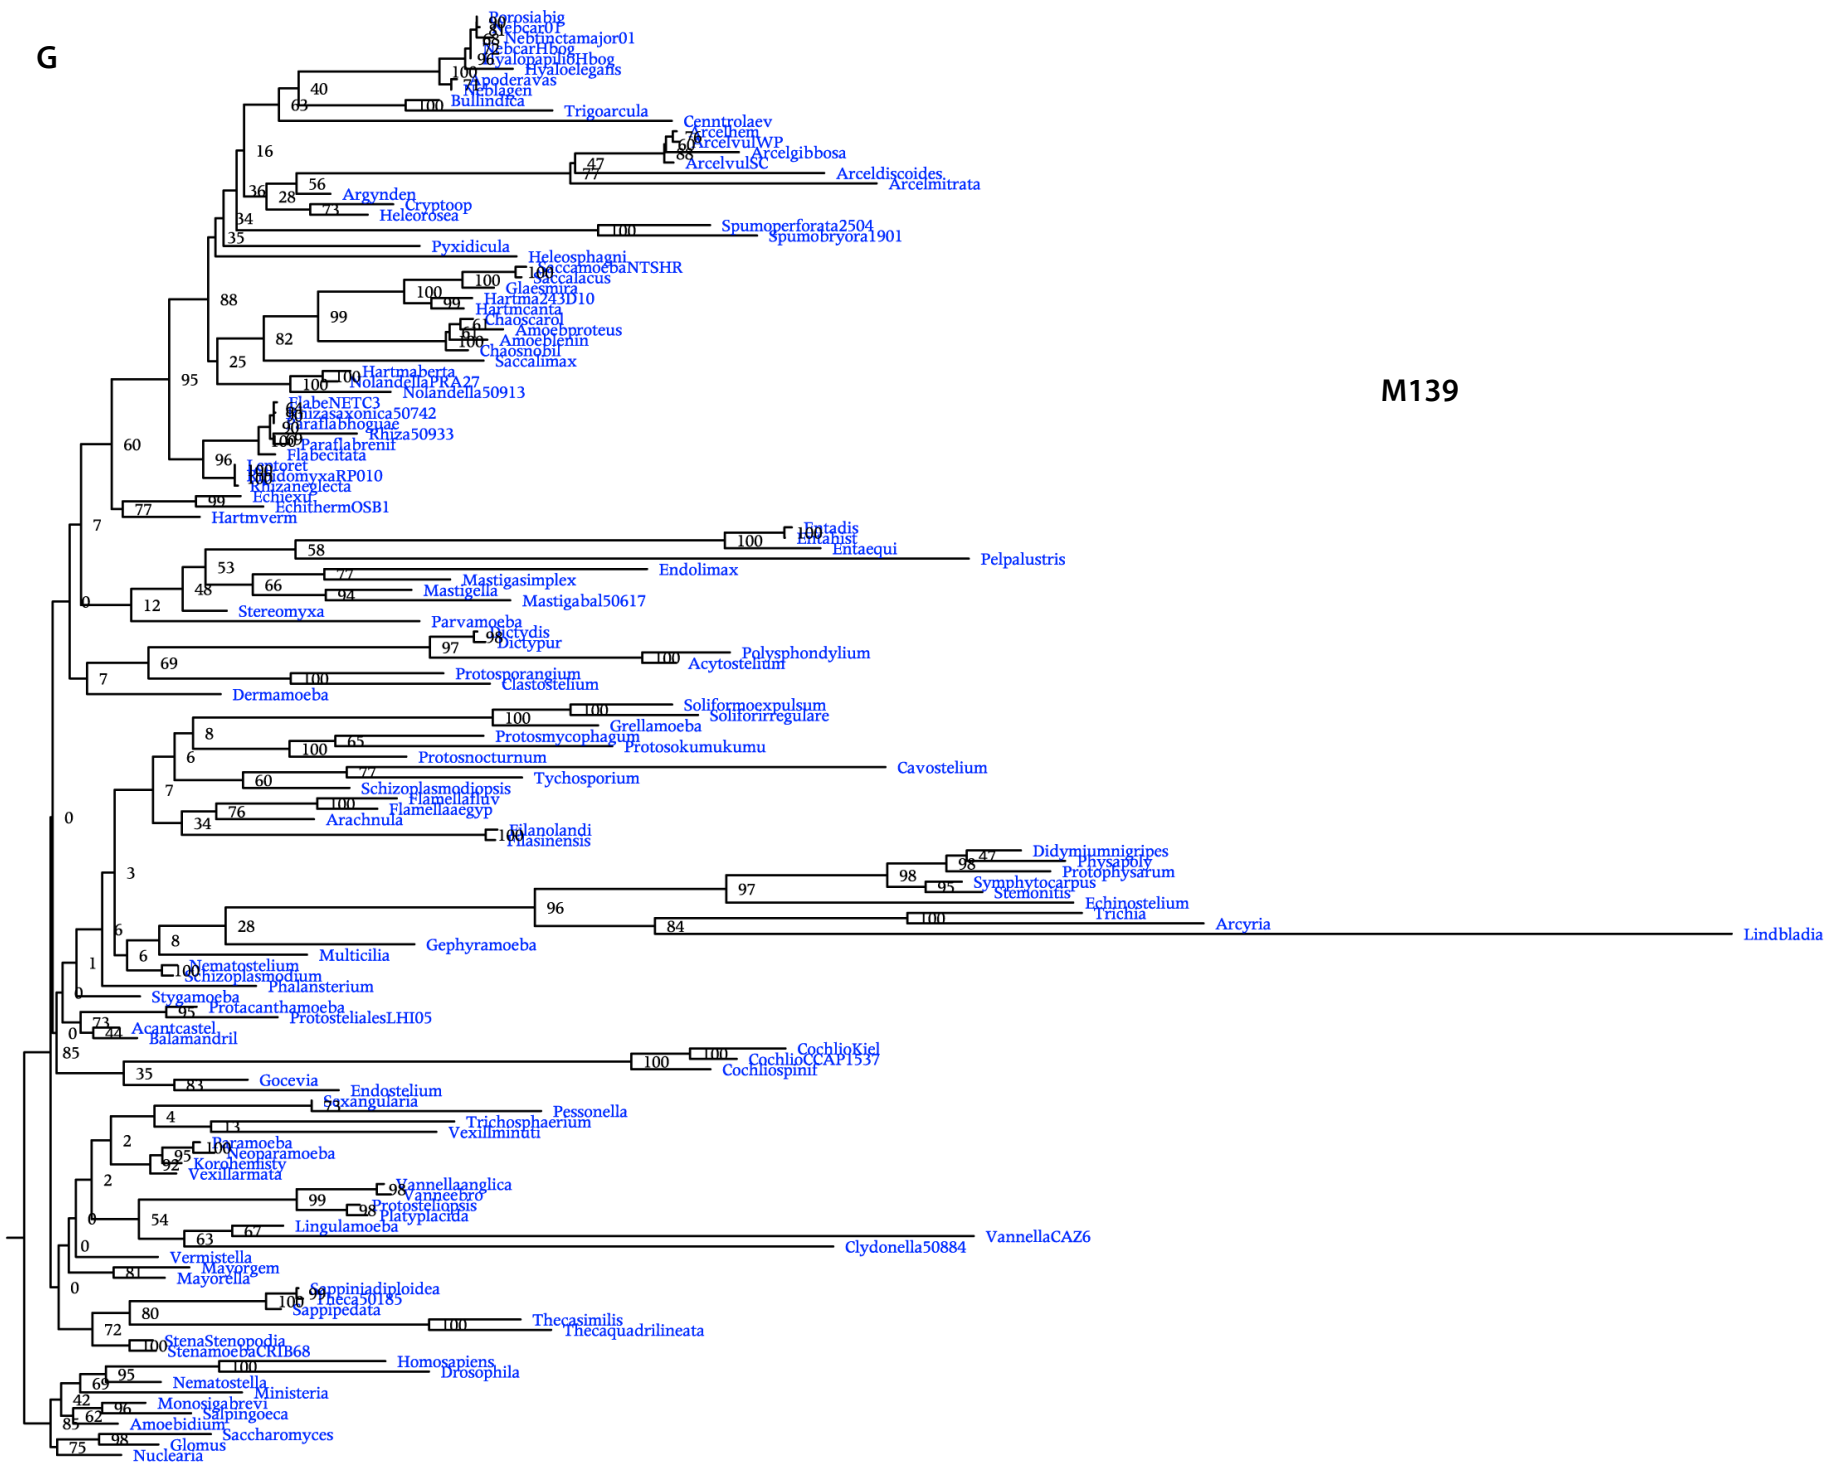

M139

H

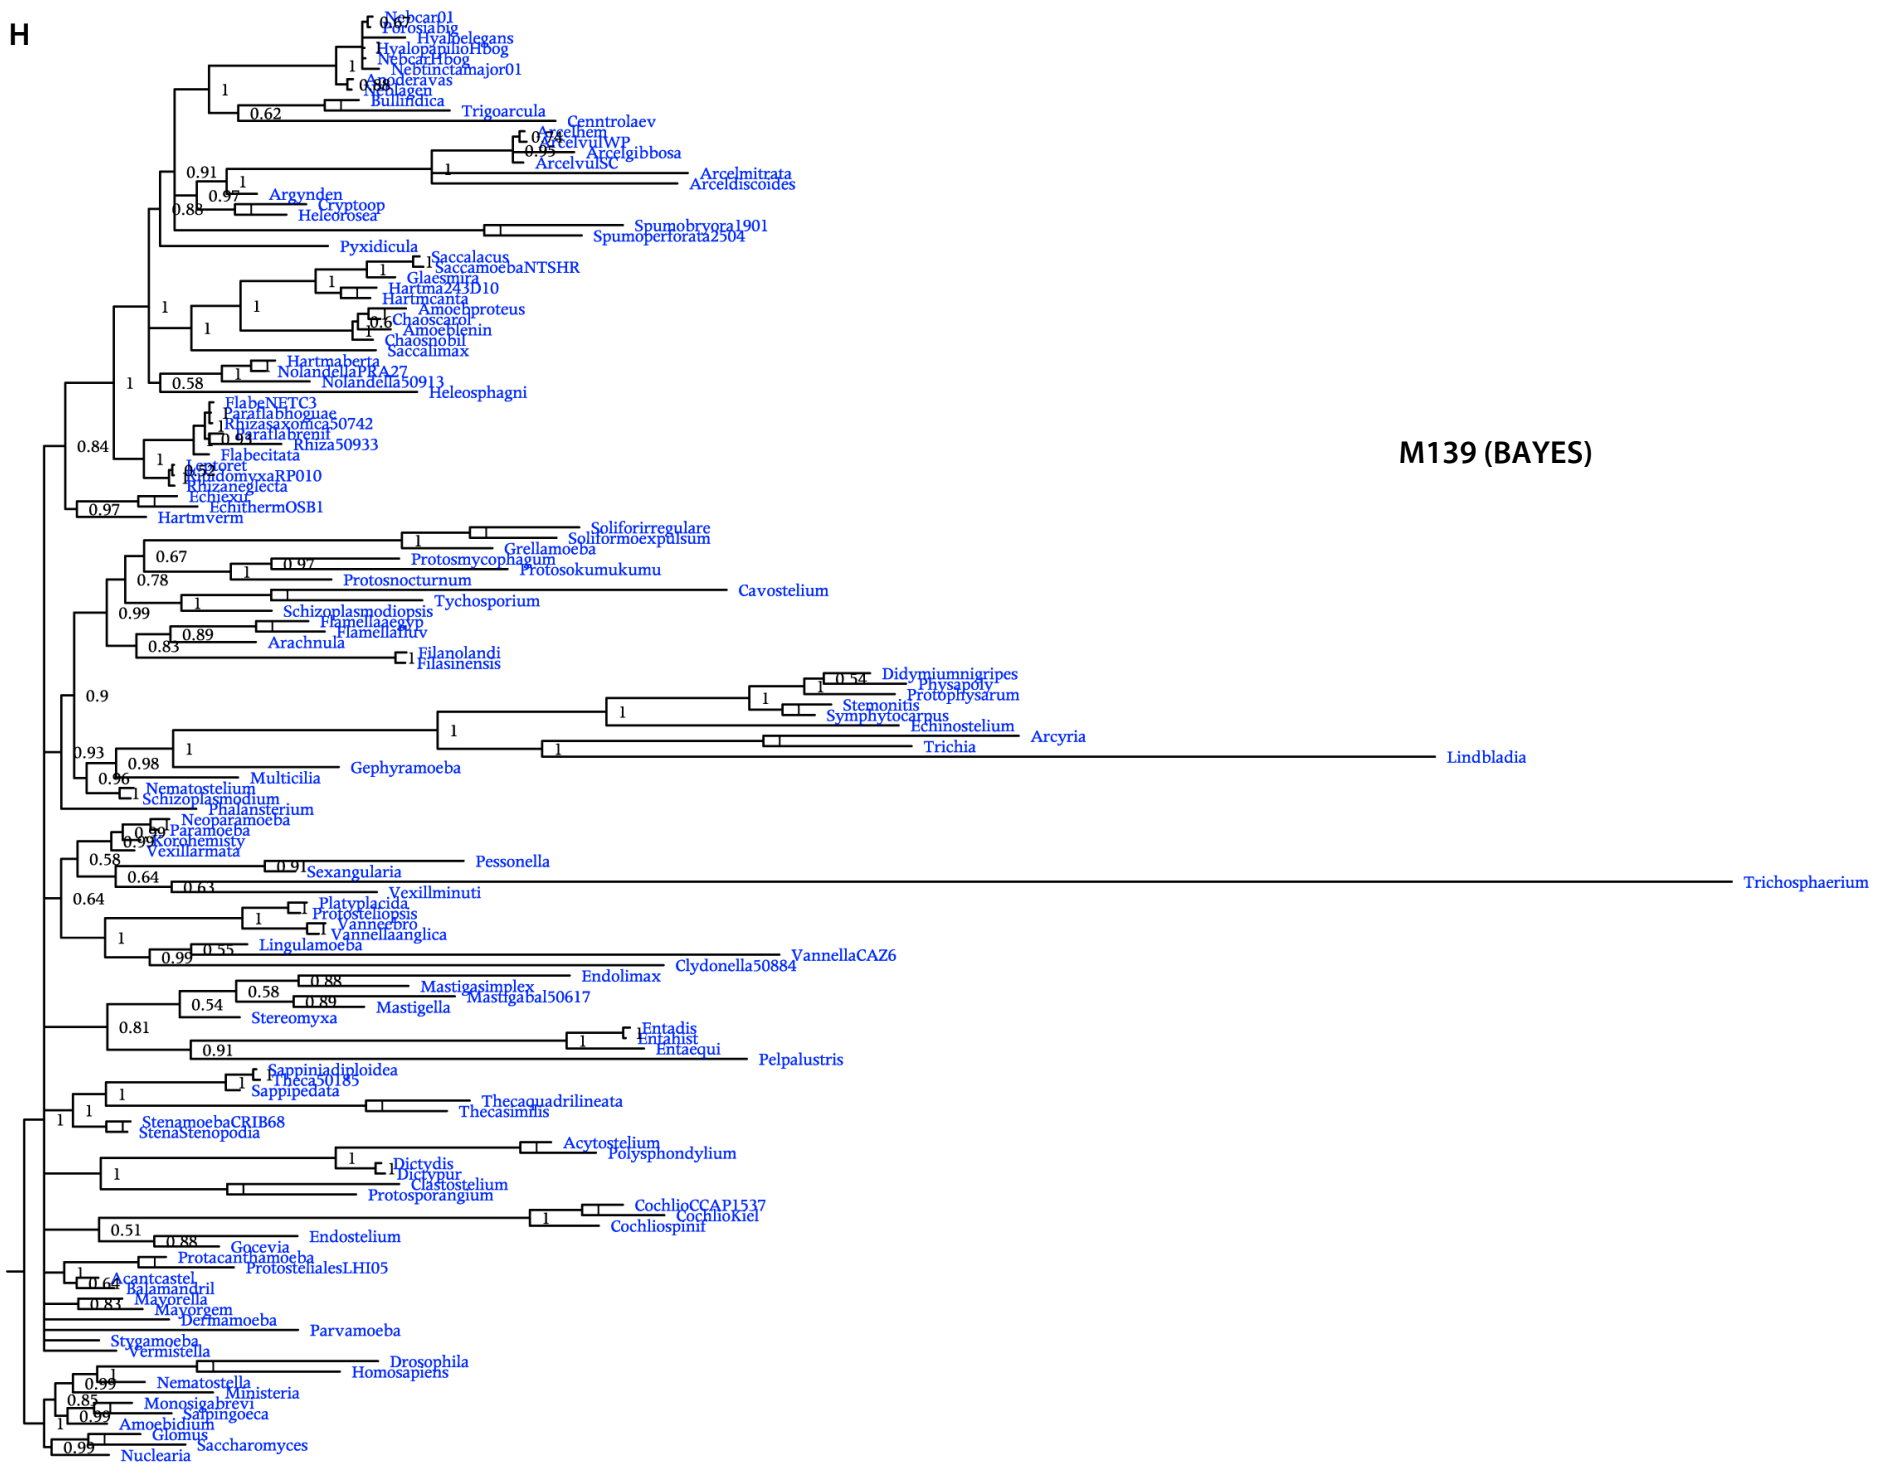

M139 (BAYES)

0.2



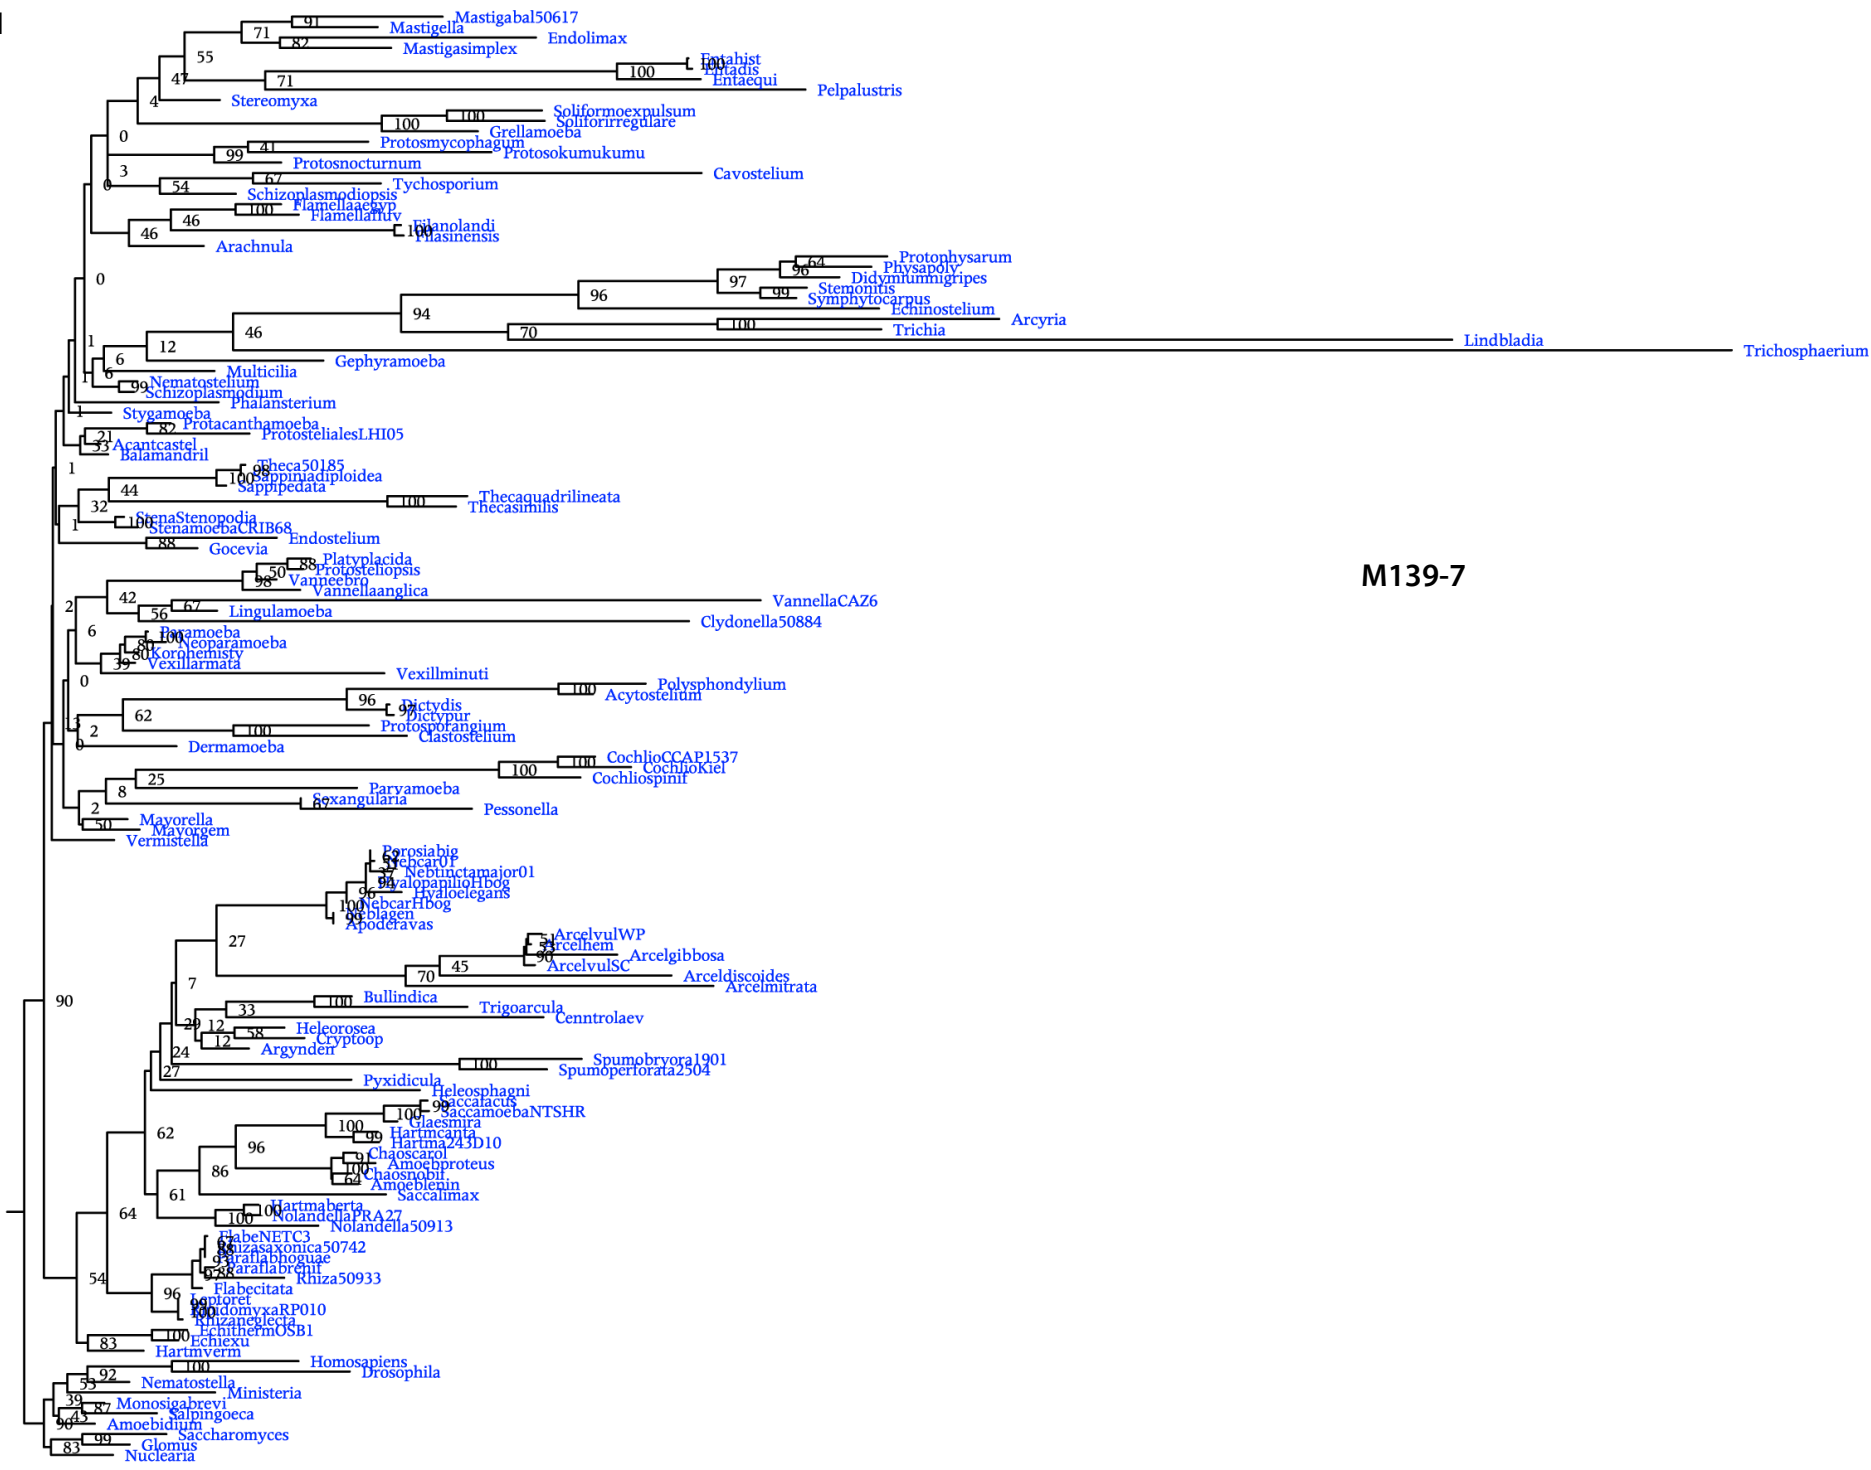

M139-7

J

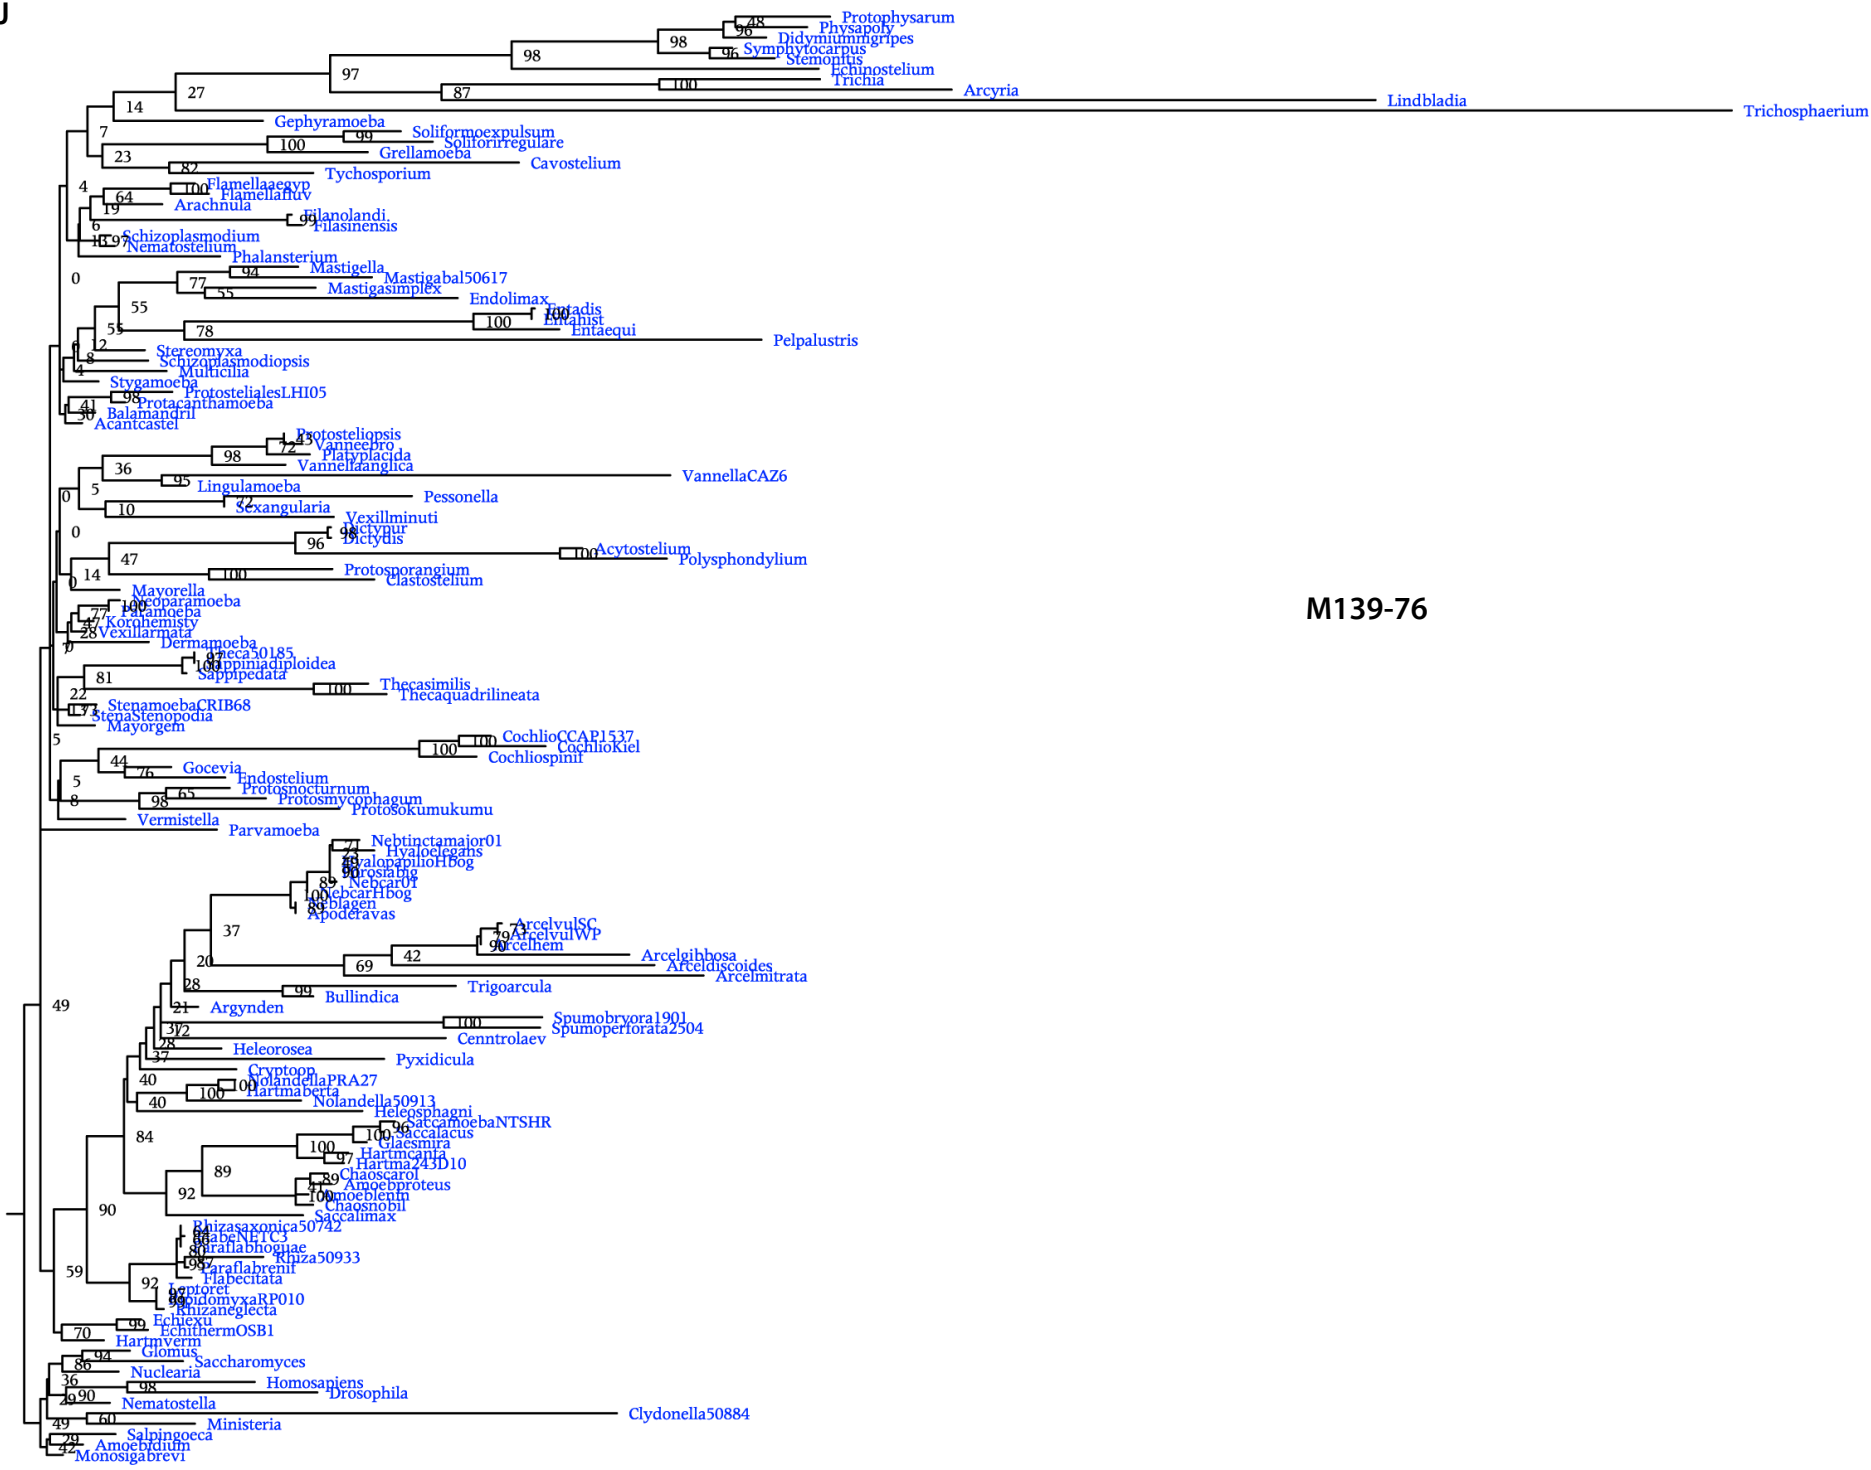

M139-76

0.05

K

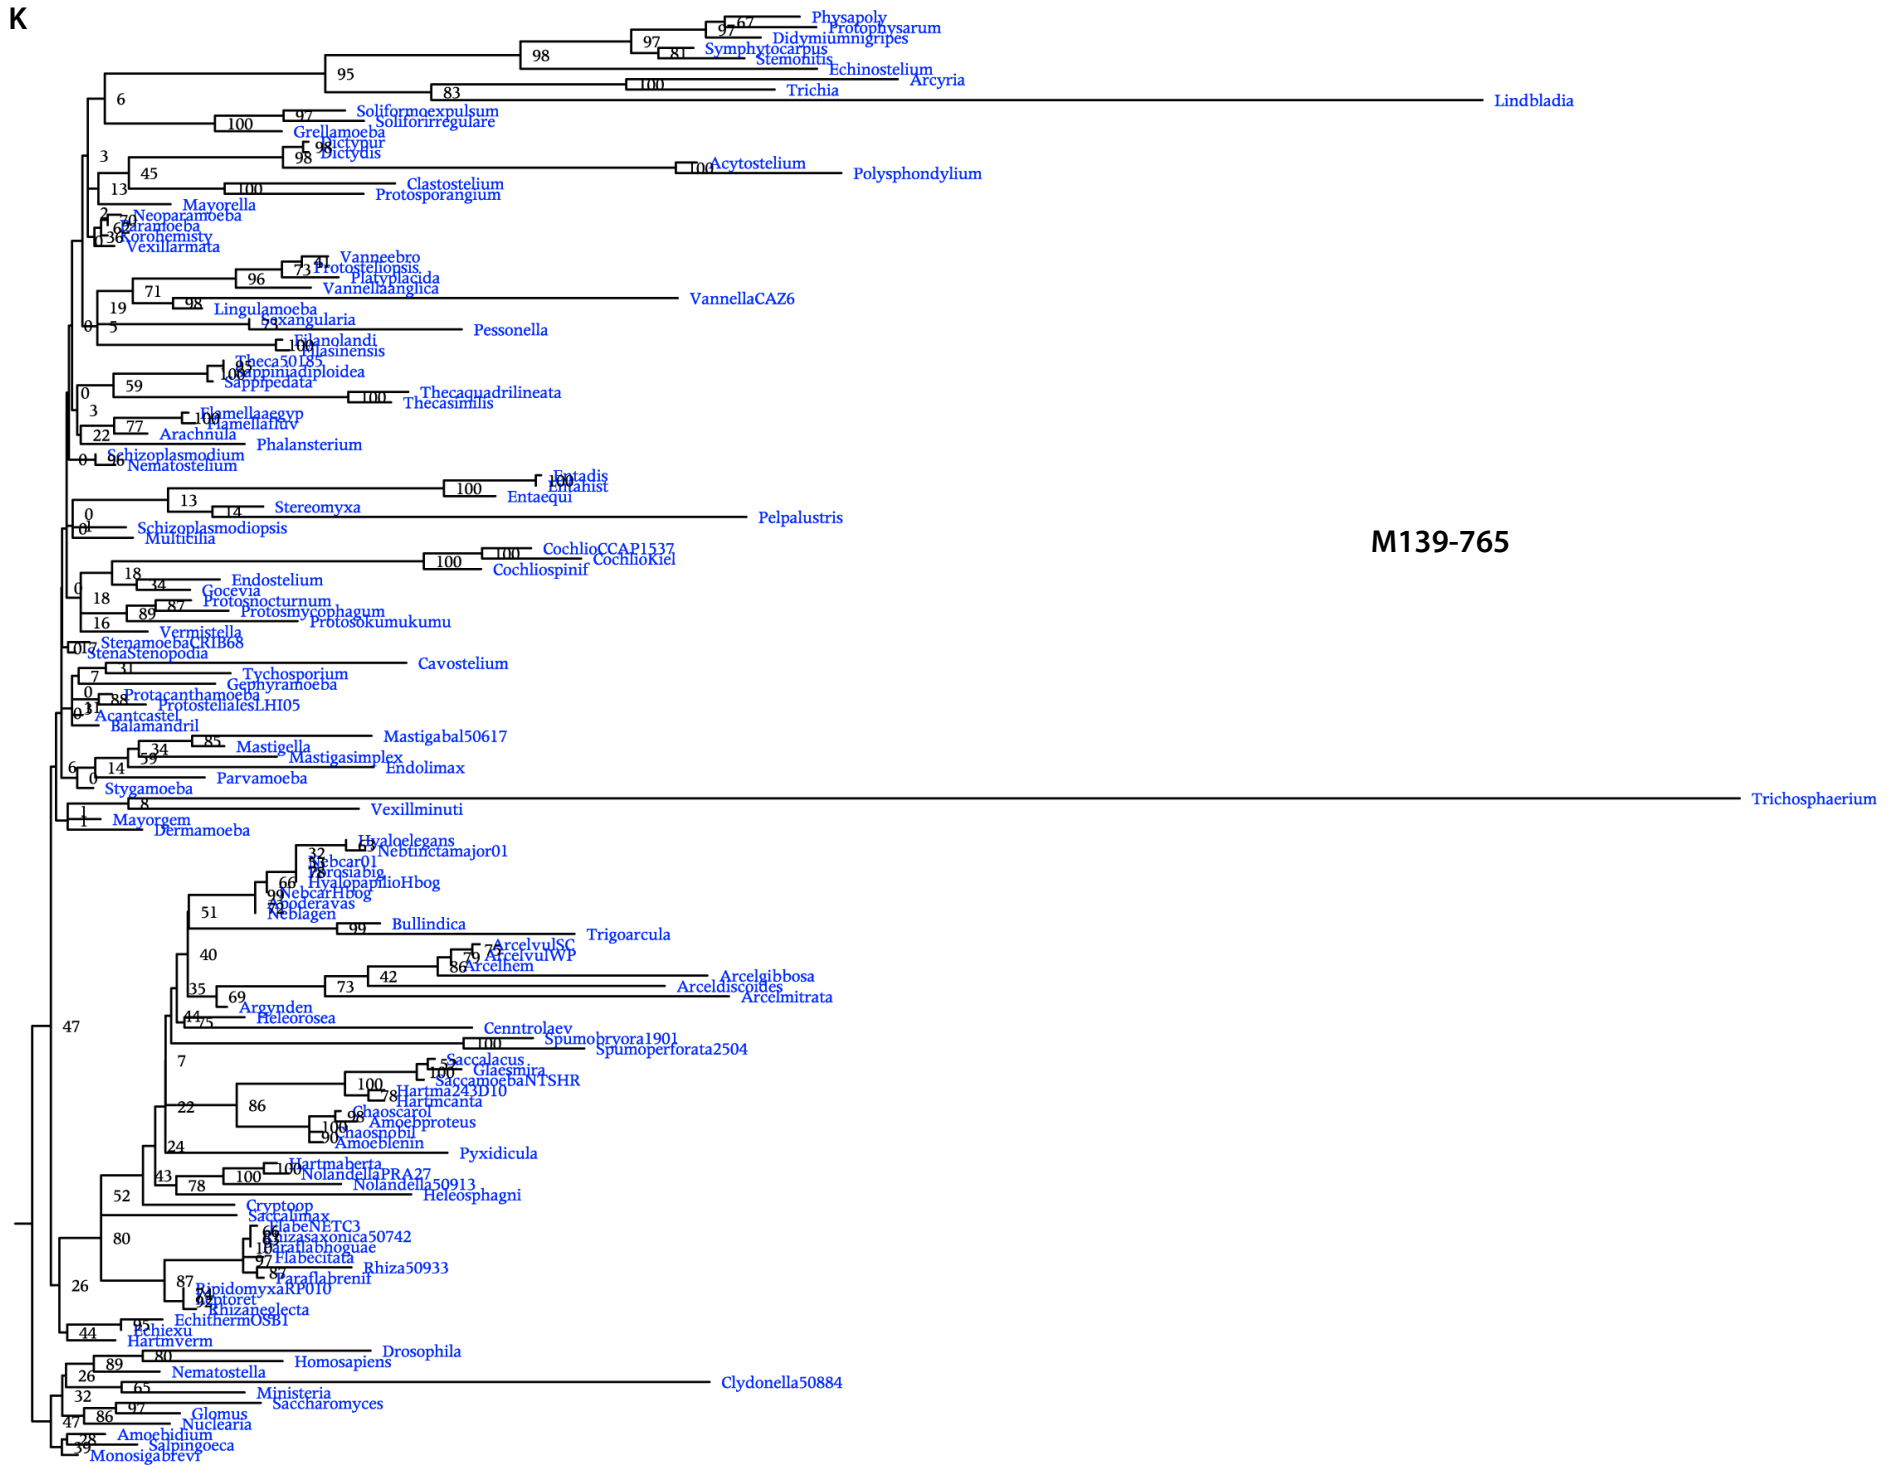

M139-765

0.04

L

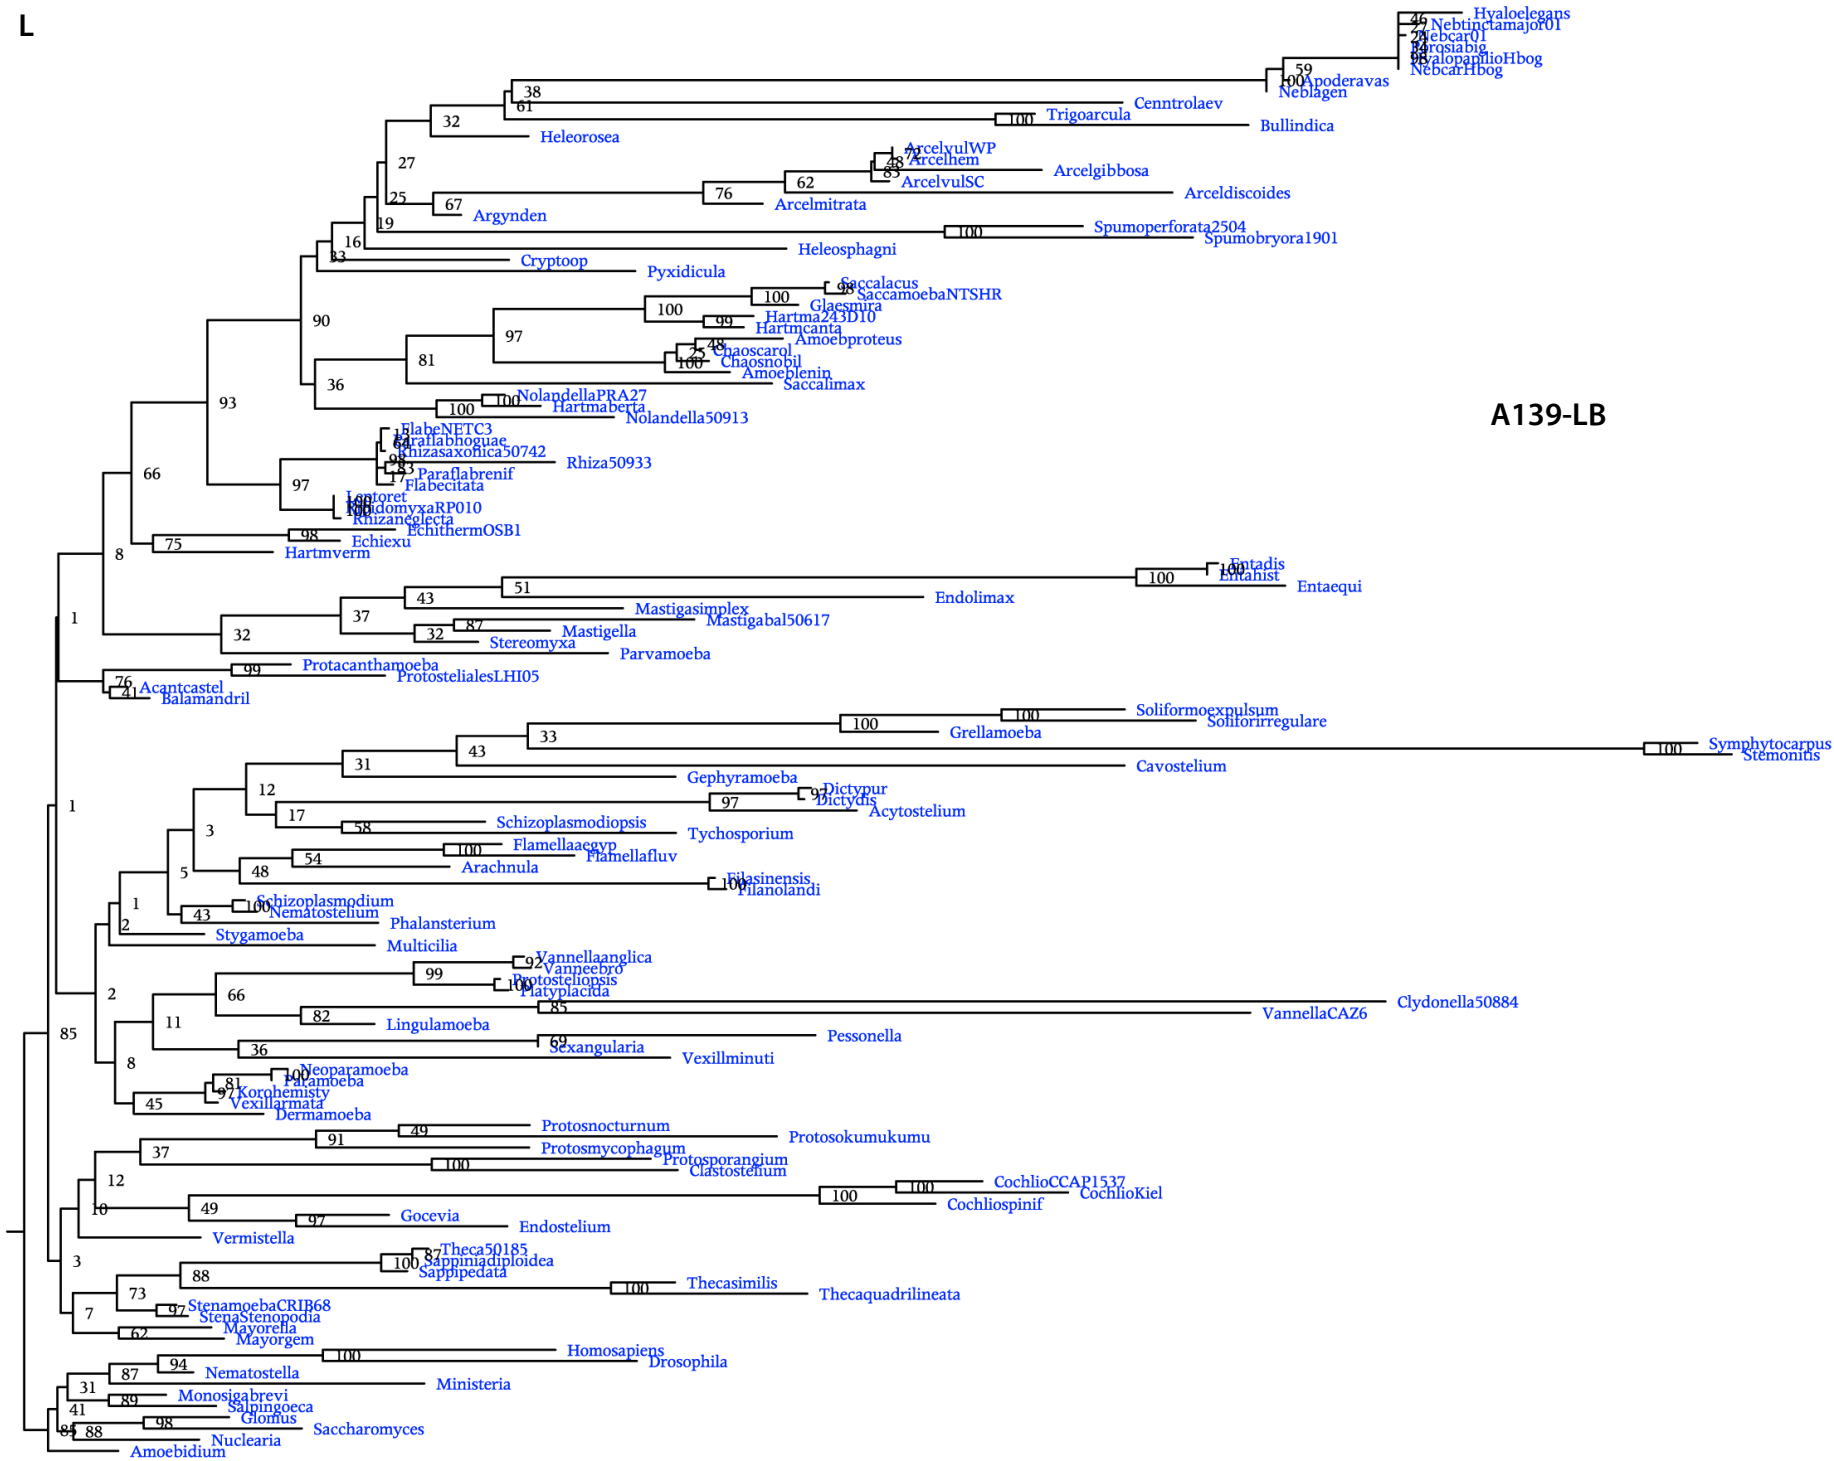

A139-LB

0.09

M

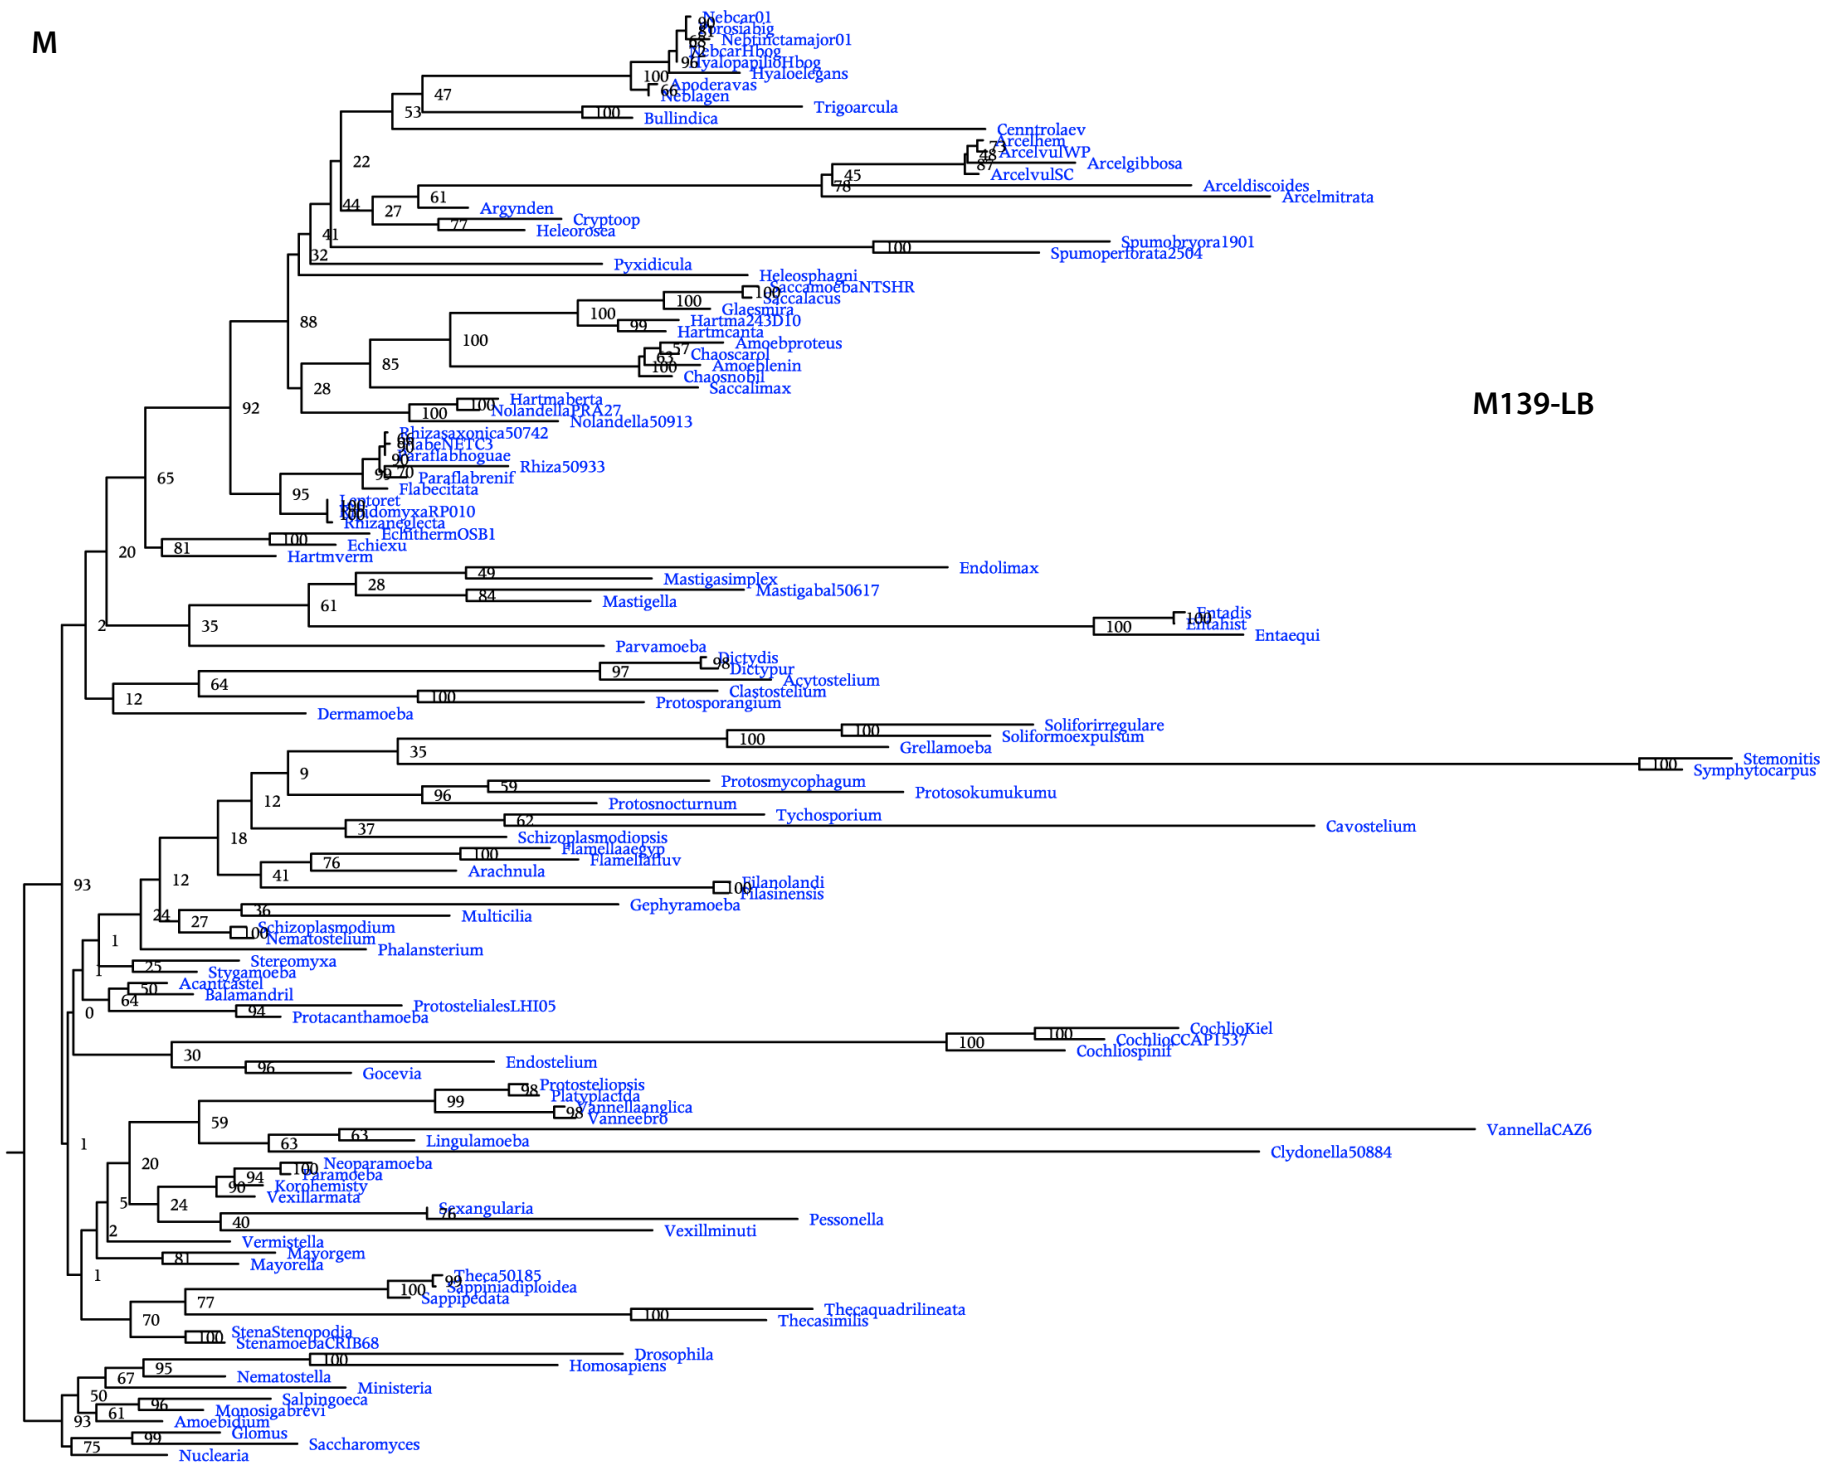

M139-LB

0.08

N

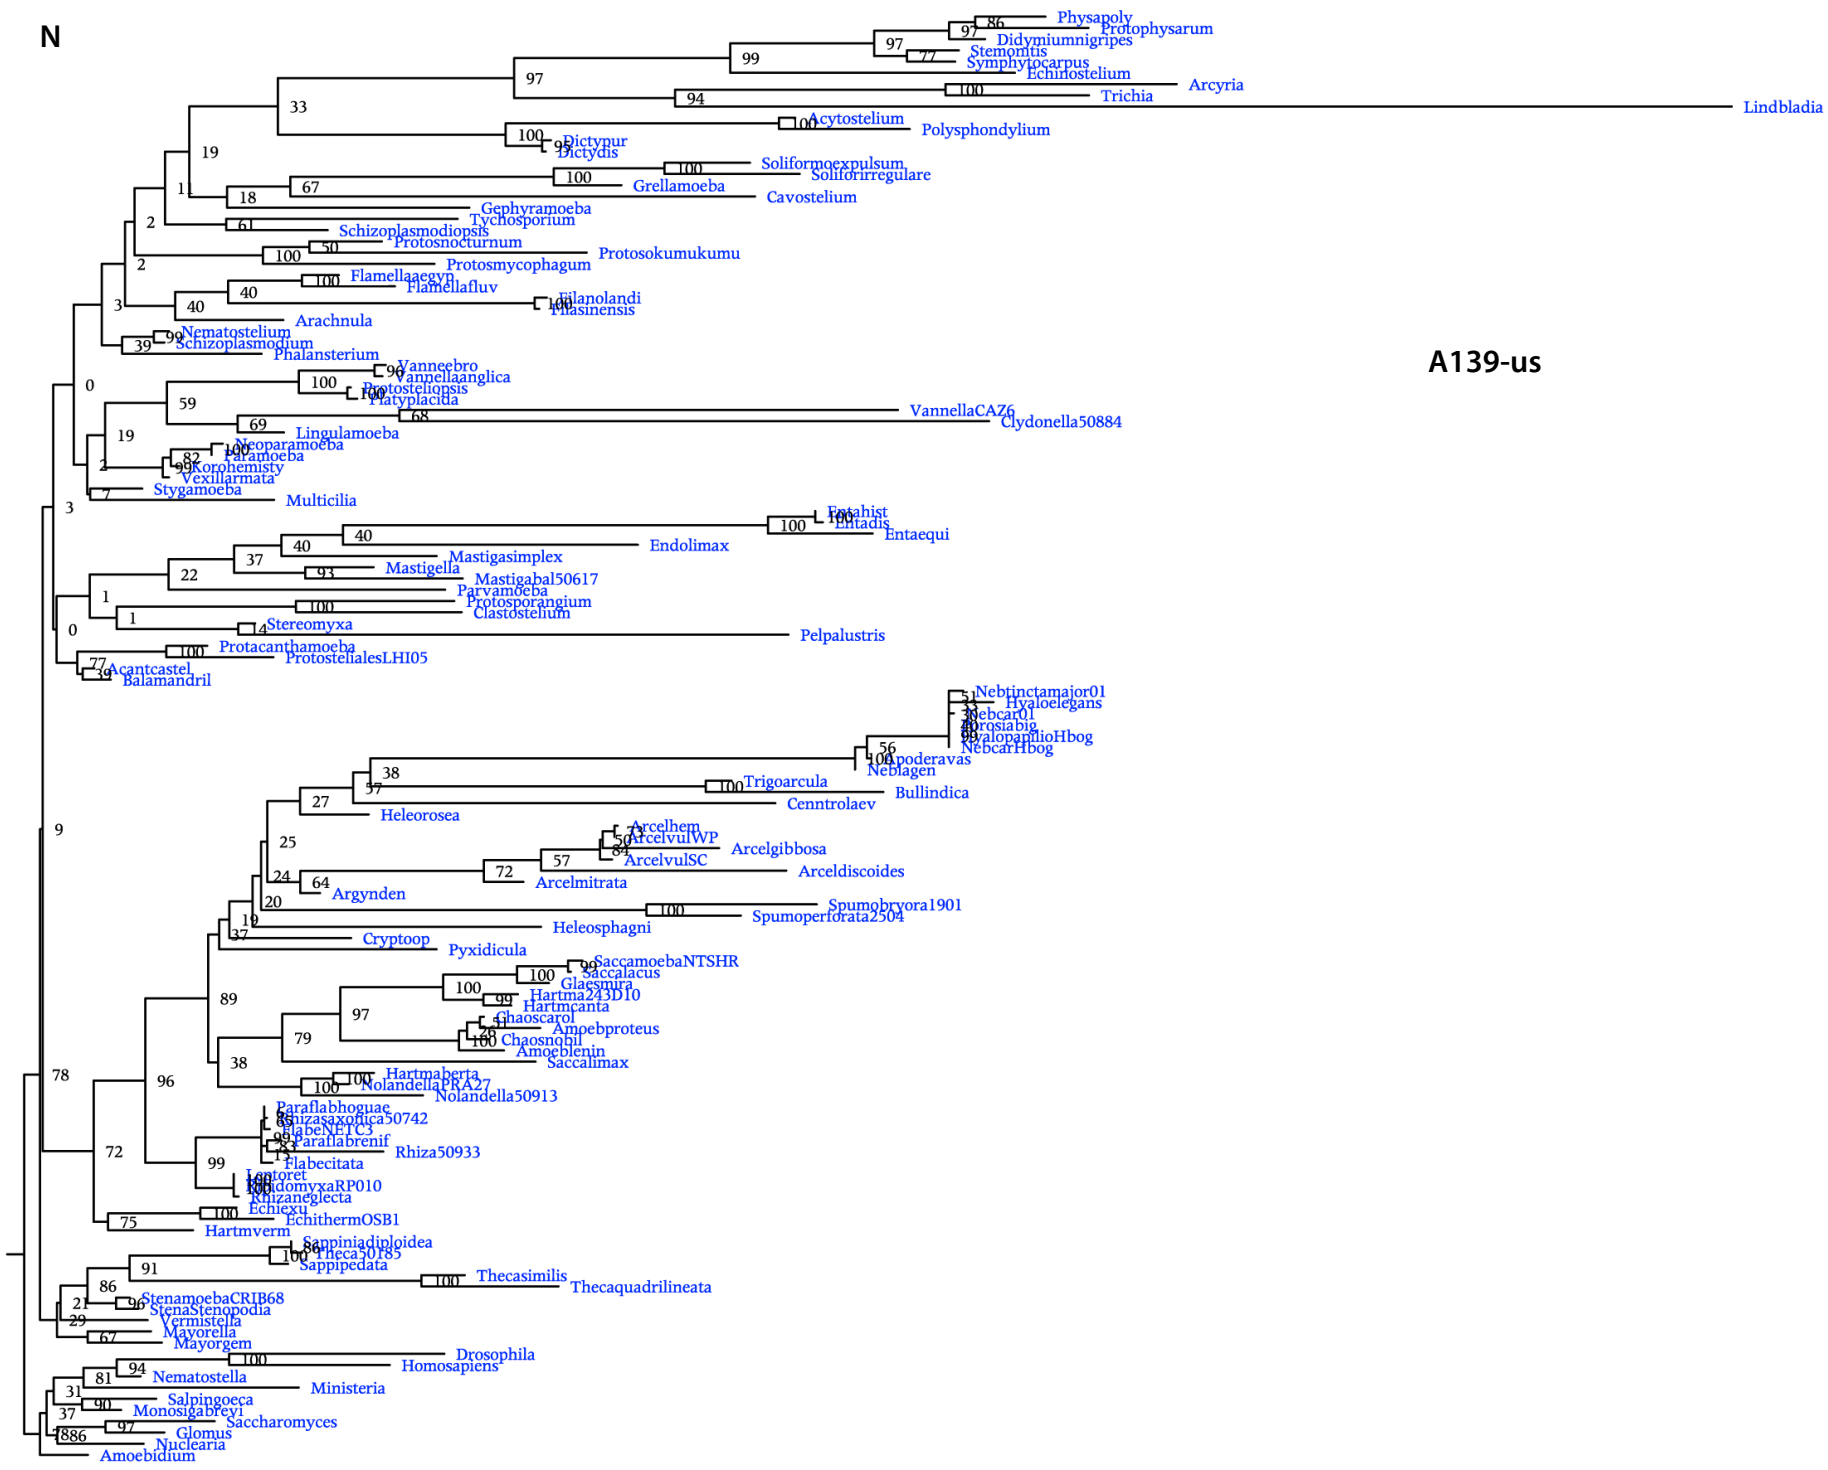

A139-us

0.08

O

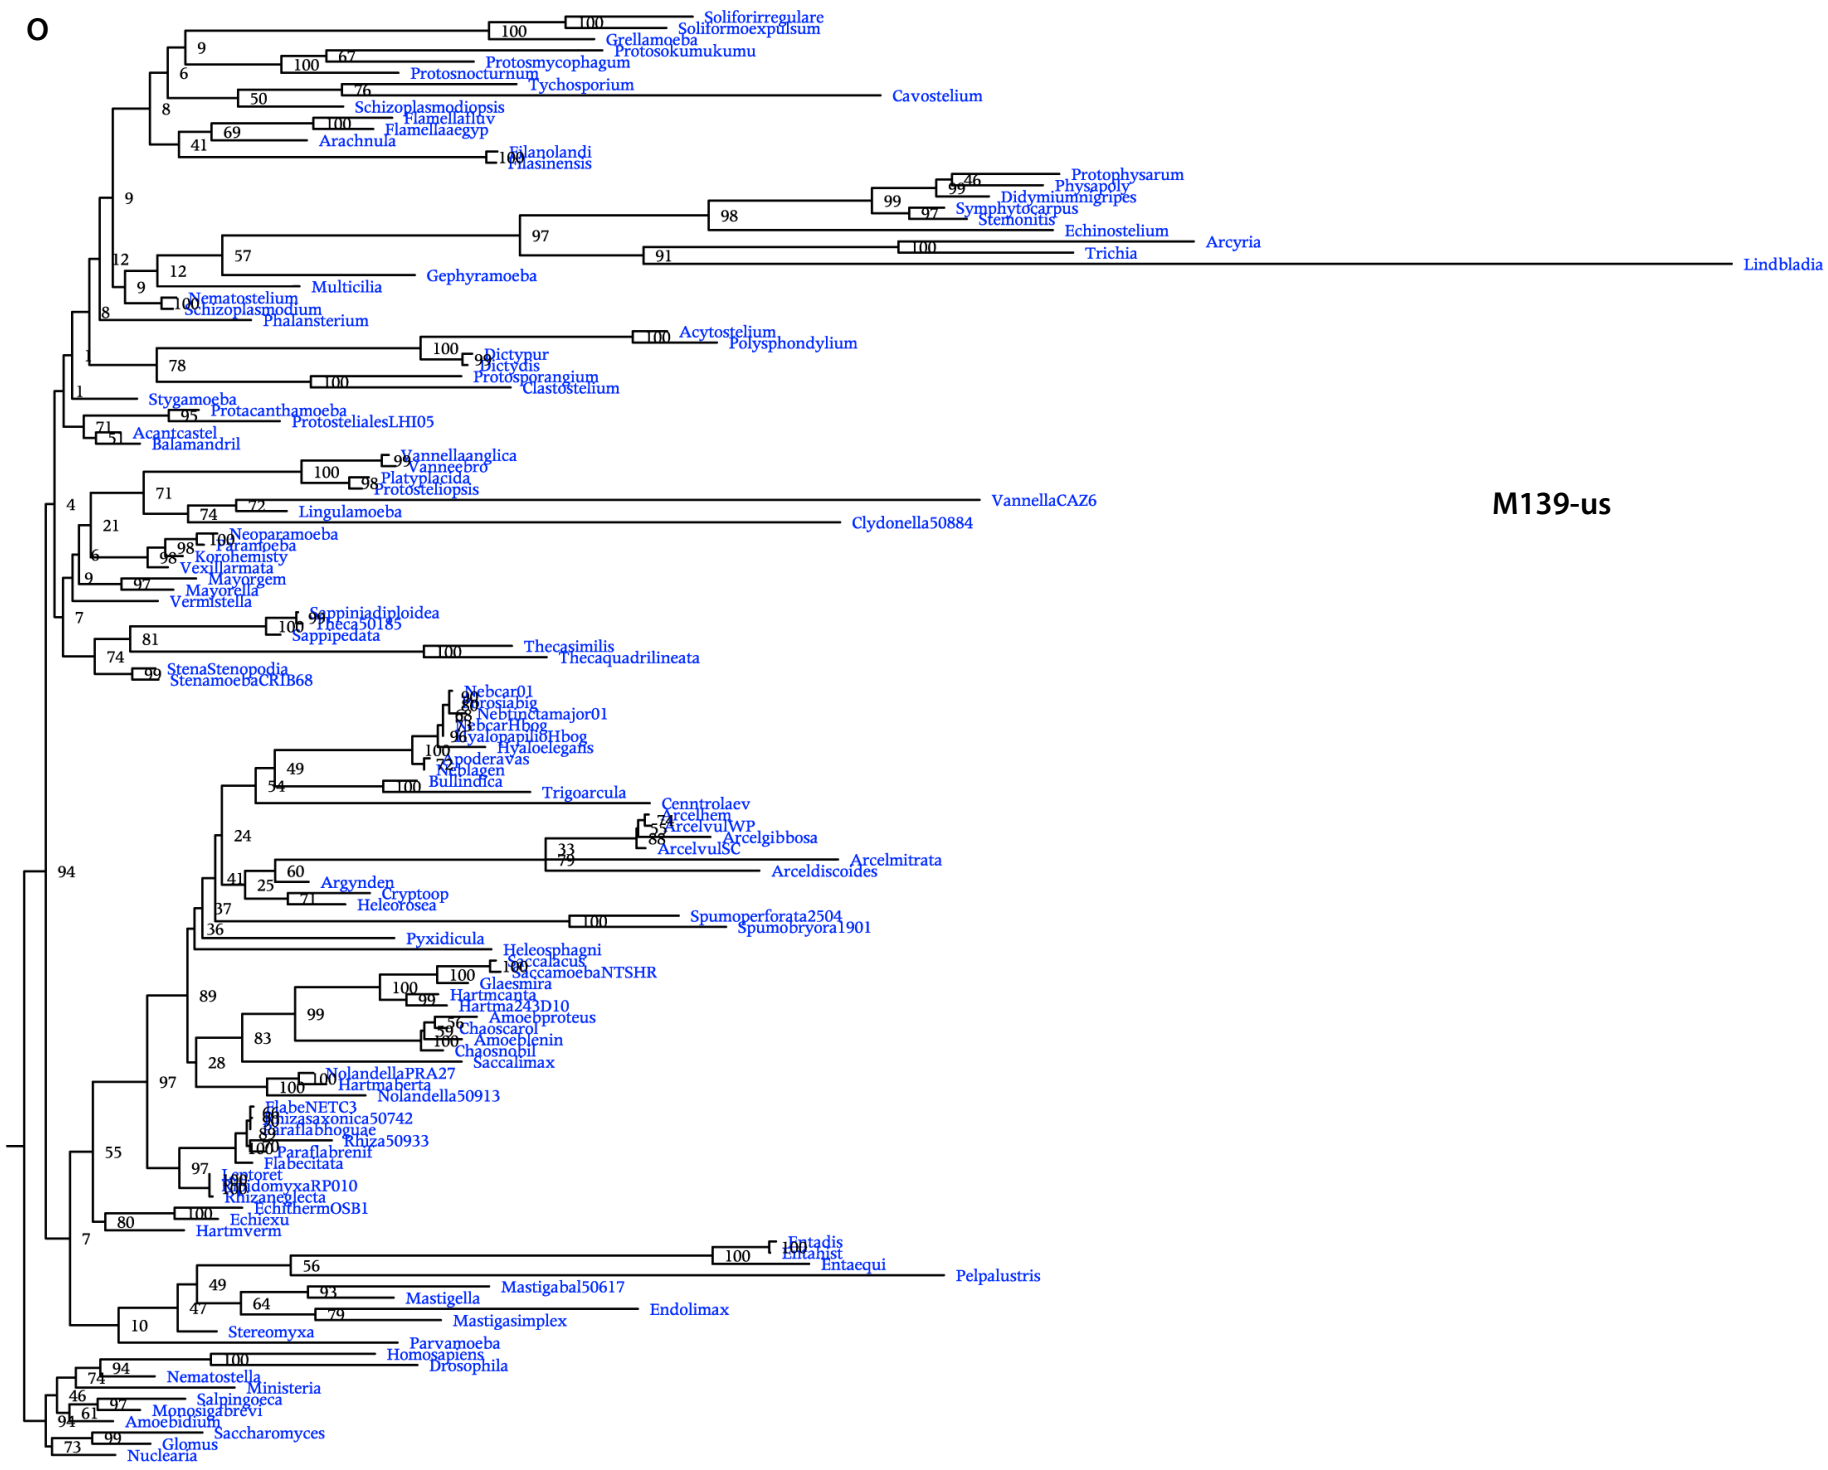

M139-us

P

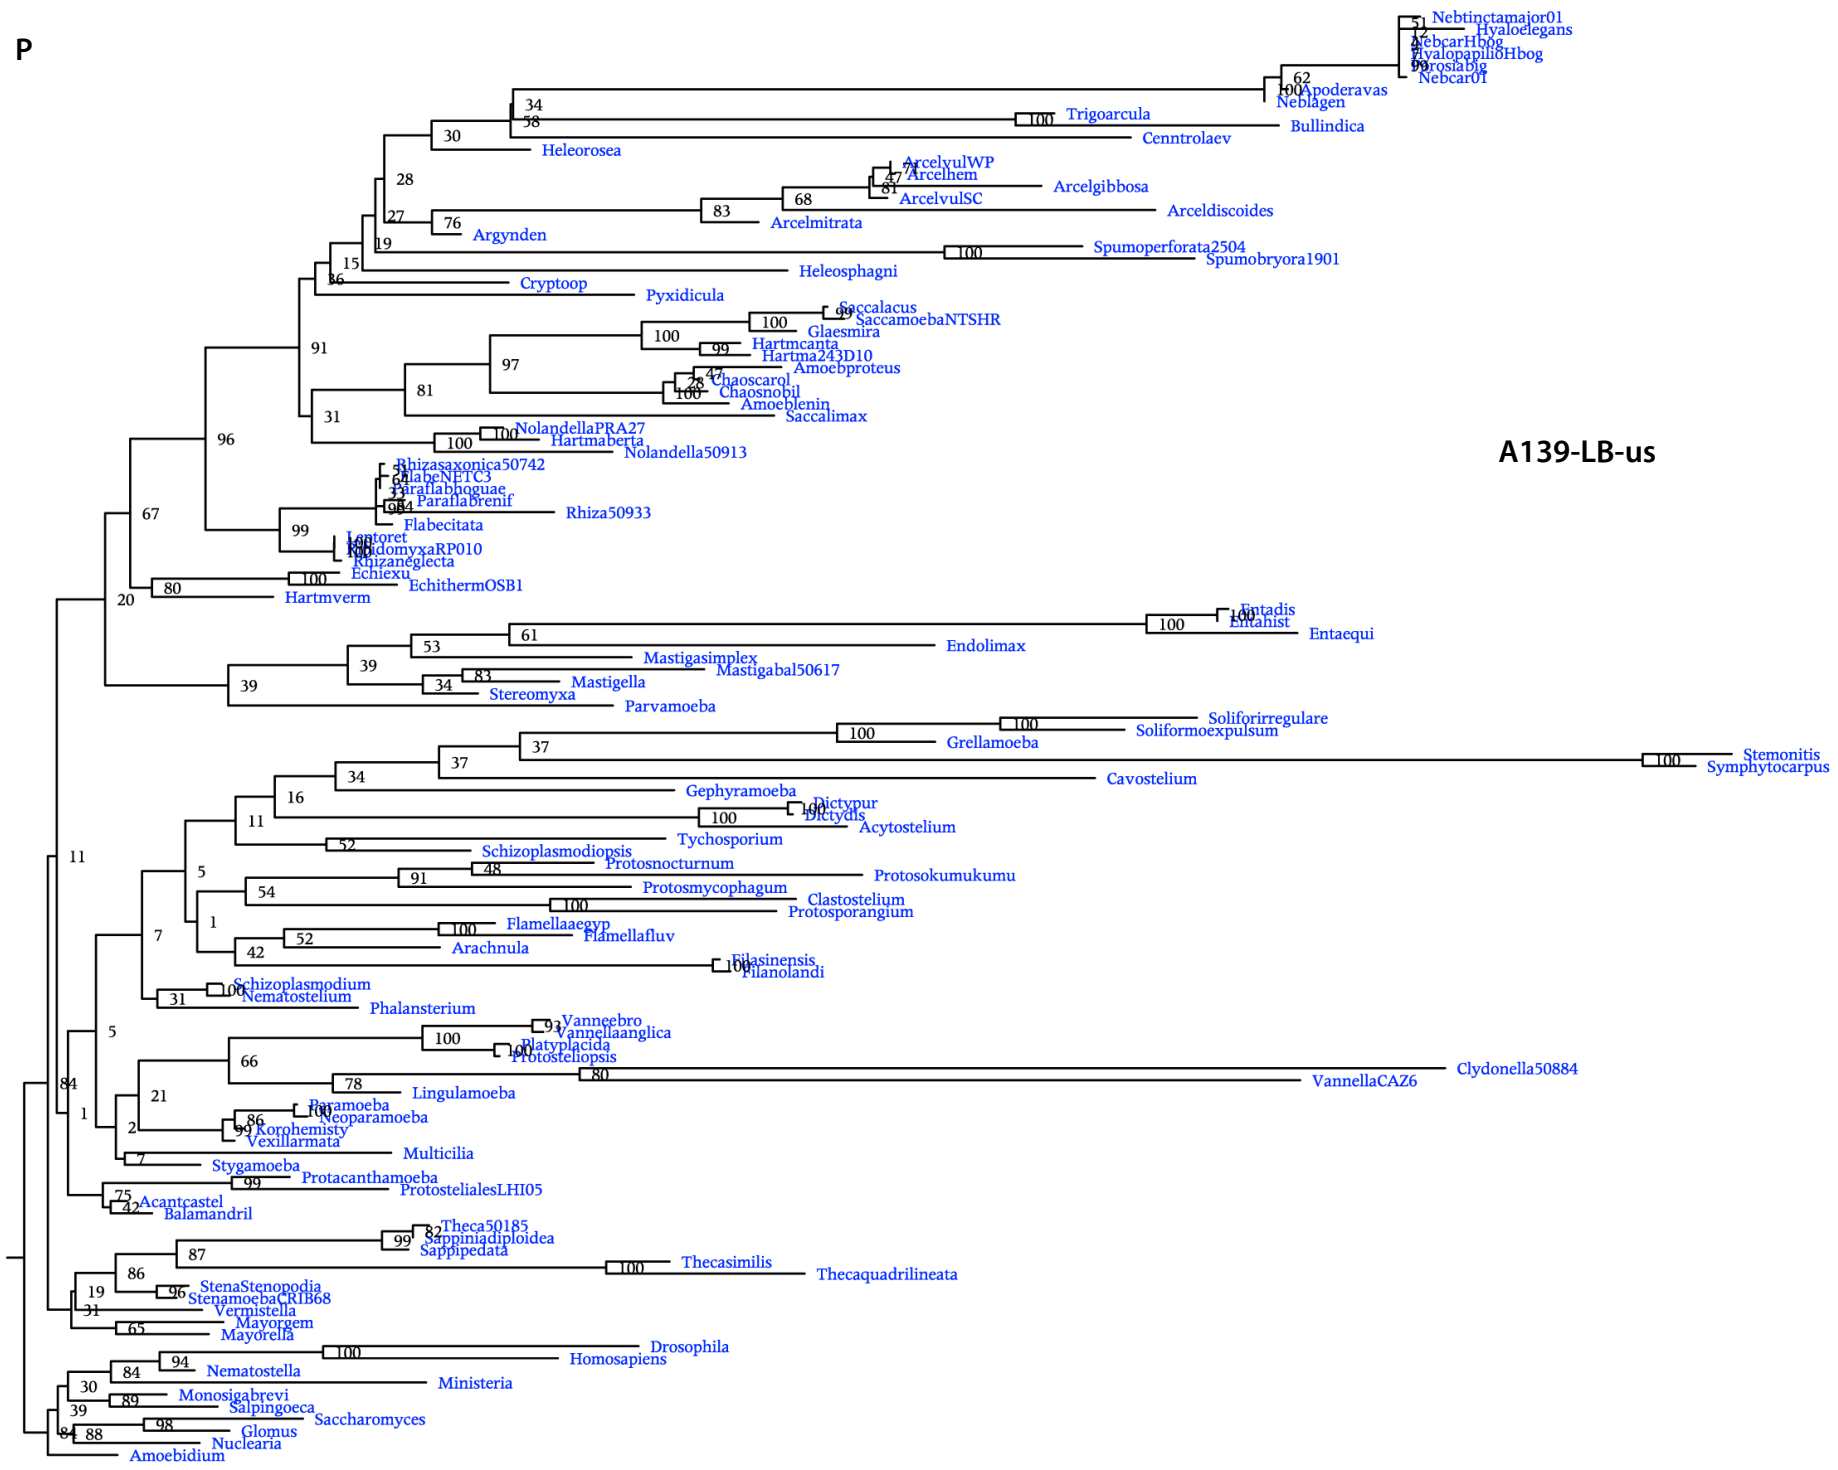

A139-LB-us

0.07



Q

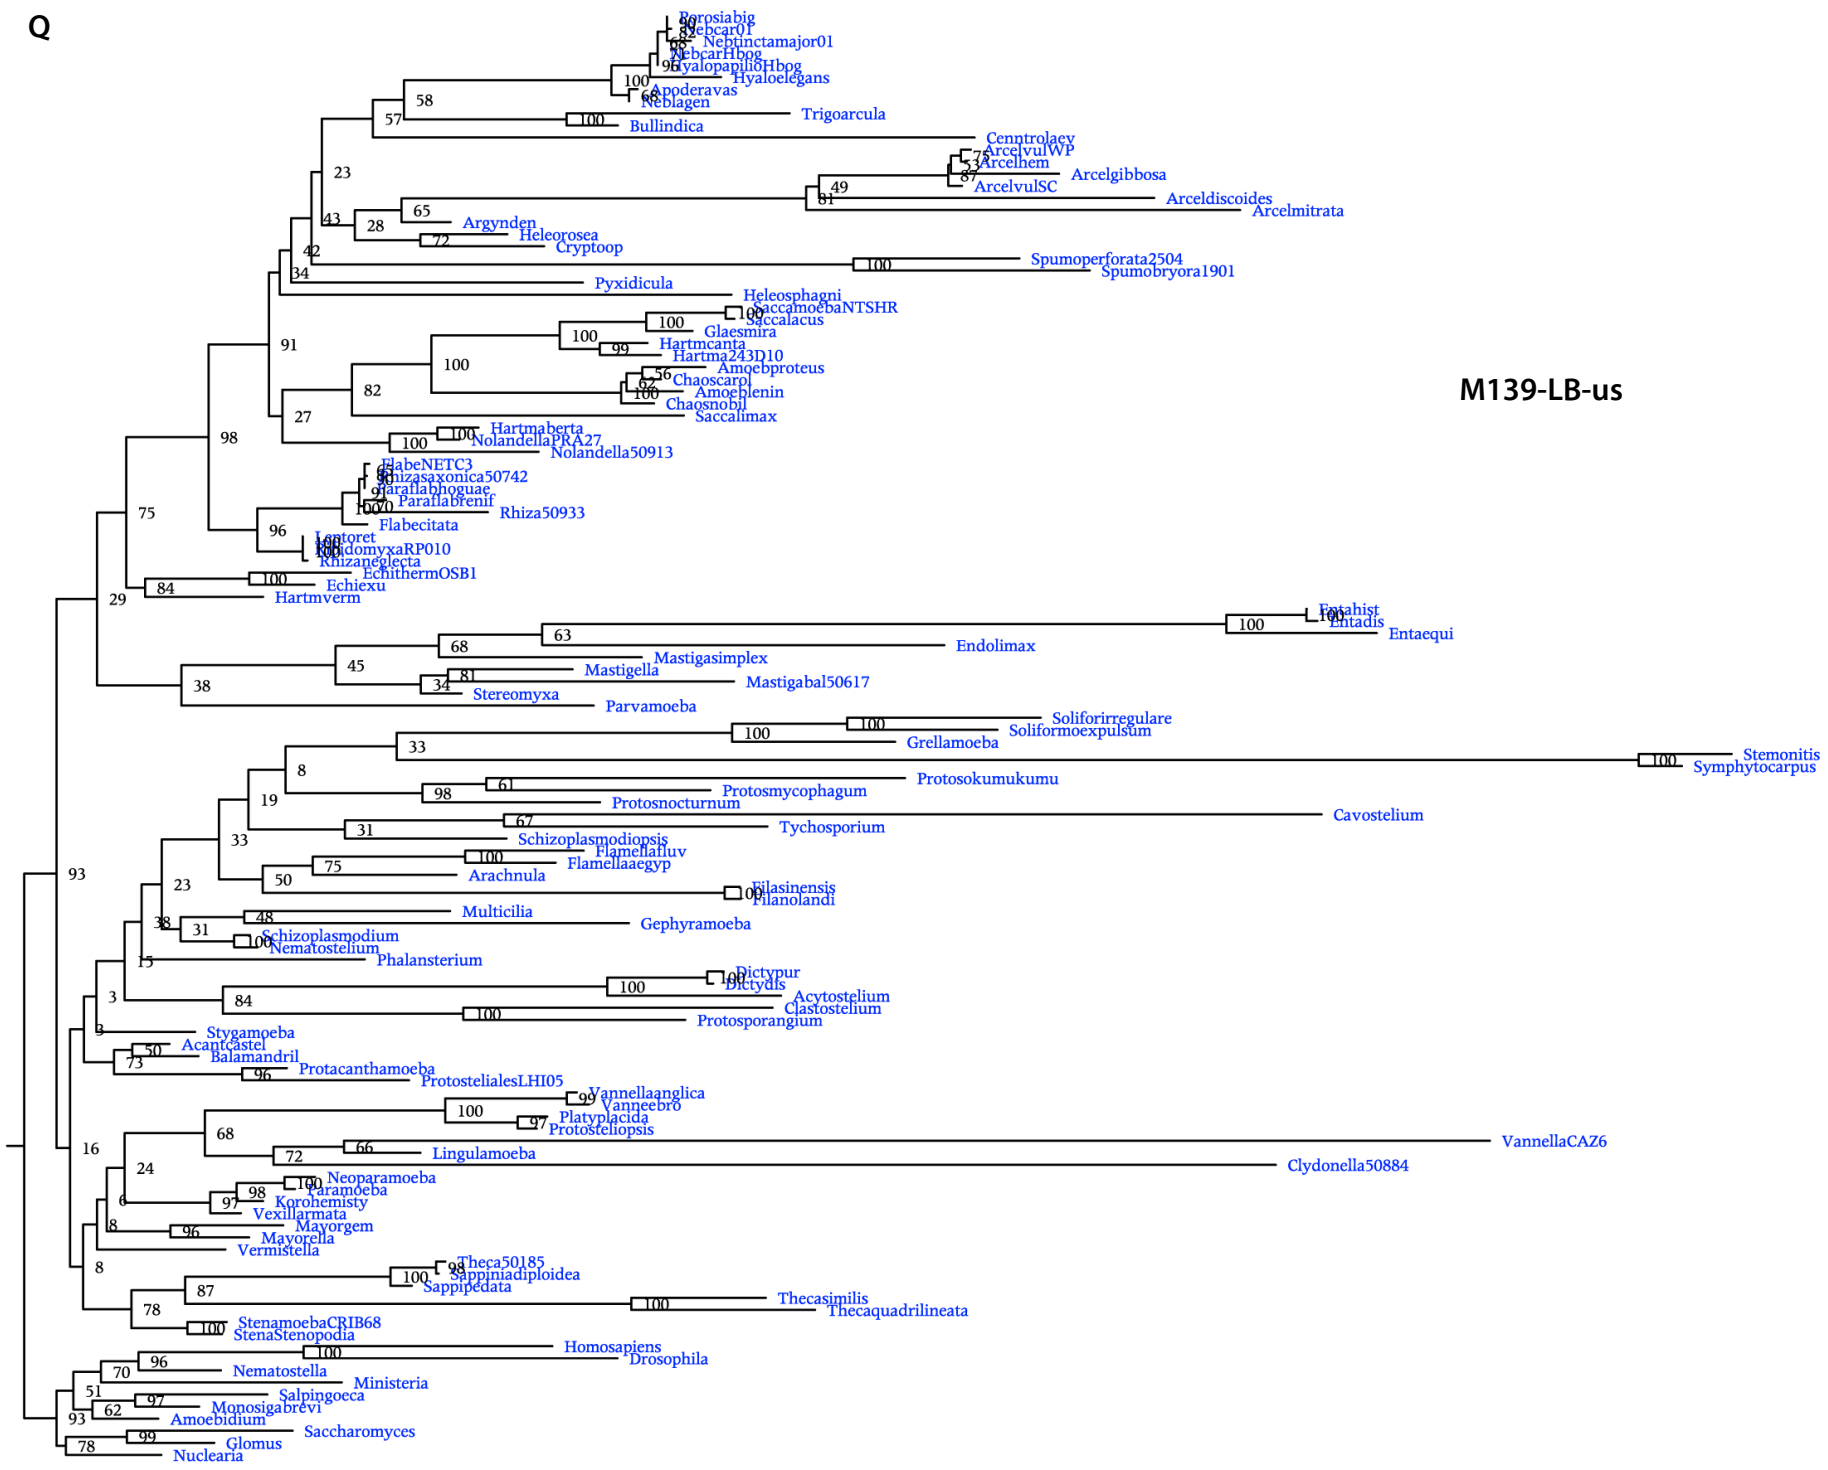

M139-LB-us

0.08
