# Supplementary material for: Comprehensive Phylogenetic Reconstruction of Amoebozoa Based on Concatenated Analyses of SSU-rDNA and Actin Genes
Source: PLoS One. 2011 Jul 28;6(7):e22780. doi: 10.1371/journal.pone.0022780 (PMC3145751; doi:10.1371/journal.pone.0022780)
Supplement: Table S1 — List of organisms, abbreviations and accession numbers for SSU-rDNA and actin genes used in concatenated analyses. Each organism is specified as to wheater it was included or not in a particular set of analyses with an x. (XLS) [file pone.0022780.s003.xls]

## Sheet: Supple. Table 1 Taxa
Supplementary Table S1: List of organisms, abbreviations and accession numbers for SSU-rDNA and actin genes used in concatenated analyses. Each organism is specified as to wheater it was included or not in a particular set of analyses with an x.
Morphogroup	Taxon	Abbreviation in Fig. S2	SSU	Actin	A53, M53	A101, M101	A139, M139	A139-LB, M139-LB	A139-us, M139-us	A139-LB-us, M139-LB-us
Acanthamoebida	Acanthamoeba castellani	Acantcastel	ACU07414	P0257.1	x	x	x	x	x	x
Dictyosteliida	Acytostelium ellipticum	Acytostelium	AM168112	none		x	x	x	x	x
Amoebida	Amoeba leningradensis	Amoeblenin	AJ314605	none			x	x	x	x
Amoebida	Amoeba proteus	Amoebproteus	AJ314604	AY294160	x	x	x	x	x	x
Outgroup	Amoebidium parasiticum	Amoebidium	AF274051	AY582843	x	x	x	x	x	x
Arcellinida	Apodera vas	Apoderavas	EU392156	none		x	x	x	x	x
incertae	Arachnula	Arachnula	EU273440	EU273435	x	x	x	x	x	x
Arcellinida	Arcella discoides	Arceldiscoides	none	JF694287		x	x	x	x	x
Arcellinida	Arcella gibbosa	Arcelgibbosa	JF694278	none		x	x	x	x	x
Arcellinida	Arcella hemisphaerica	Arcelhem	EU273445	ACA04819.1	x	x	x	x	x	x
Arcellinida	Arcella mitrata	Arcelmitrata	JF694279	JF694295	x	x	x	x	x	x
Arcellinida	Arcella vulgaris SC	ArcelvulSC	HM853761	ADM22204.1	x	x	x	x	x	x
Arcellinida	Arcella vulgaris WP	ArcelvulWP	HM853762	ADM22215.1	x	x	x	x	x	x
Myxogastrida	Arcyria denudata	Arcyria	AY643825	none			x		x
Arcellinida	Argynia dentata	Argynden	EU392158	none		x	x	x	x	x
Acanthamoebida	Balamuthia mandrilaris	Balamandril	AF019071	none		x	x	x	x	x
Arcellinida	Bullinularia indica	Bullindica	AY848970	none		x	x	x	x	x
Cavosteliida	Cavostelium apophysatum	Cavostelium	FJ766476	none			x	x	x	x
Arcellinida	Centropyxis laevigata	Cenntrolaev	AY848965	none		x	x	x	x	x
Amoebida	Chaos carolinensis	Chaoscarol	AJ314607	AY294157	x	x	x	x	x	x
Amoebida	Chaos nobile	Chaosnobil	AJ314606	none			x	x	x	x
Protosporangiida	Clastostelium recurvatum	Clastostelium	FJ766474	none			x	x	x	x
Vanellidae	Clydonella	Clydonella50884	AY183892	none			x	x	x	x
incertae	Cochliopodium CCAP1537	CochlioCCAP1537	AY785056	none		x	x	x
incertae	Cochliopodium Kiel	CochlioKiel	AY785057	none			x	x
incertae	Cochliopodium spiniferum	Cochliospinif	AY775130	none		x	x	x
Arcellinida	Cryptodifflugia operculata	Cryptoop	JF694280	JF694301	x	x	x	x	x	x
incertae	Dermamoeba	Dermamoeba	AY294148	AY294159	x	x	x	x
Dictyosteliida	Dictyostelium discoideum	Dictydis	K02641	DDB_G0272248	x	x	x	x	x	x
Dictyosteliida	Dictyostelium purpureum	Dictypur	AM168061	DPU_G0071500	x	x	x	x	x	x
Myxogastrida	Didymium nigripes	Didymiumnigripes	AF239230	none		x	x		x
Outgroup	Drosophila melanogaster	Drosophila	M21017	NP_523800	x	x	x	x	x	x
Echinamoebidae	Echinamoeba exudans	Echiexu	AF293895	none			x	x	x	x
Echinamoebidae	Echinamoeba thermarum OSB1	EchithermOSB1	AJ489261	none		x	x	x	x	x
Myxogastrida	Echinostelium arboreum	Echinostelium	AY842030	none		x	x		x
Archamoebida	Endolimax nana	Endolimax	AF149916	none		x	x	x	x	x
incertae	Endostelium zonatum	Endostelium	FJ766469	none			x	x
Pelobiontida	Entamoeba dispar	Entadis	Z49256	XM_001740954	x	x	x	x	x	x
Pelobiontida	Entamoeba equi	Entaequi	DQ286371	none			x	x	x	x
Pelobiontida	Entamoeba histolytica	Entahist	AB426549	XM_650064	x	x	x	x	x	x
Filamoebae	Filamoeba nolandi	Filanolandi	AY714368	none		x	x	x	x	x
Filamoebae	Filamoeba sinensis	Filasinensis	AY714369	none			x	x	x	x
Leptomyxidae	Flabellula citata	Flabecitata	EU852654	none		x	x	x	x	x
Leptomyxidae	Flabellula NETC3	FlabeNETC3	EU852656	none			x	x	x	x
Incertae	Flamella aegyptia	Flamellaaegyp	EU186021	none		x	x	x	x	x
Incertae	Flamella fluviatilis	Flamellafluv	EU186024	none			x	x	x	x
Acramoebidae	Gephyramoeba (Acramoeba dendroida)	Gephyramoeba	AF293897	none		x	x	x	x	x
Amoebida	Glaeseria mira	Glaesmira	AY294146	AY294155	x	x	x	x	x	x
Outgroup	Glomus caledonium	Glomus	Y17635	AJ567828	x	x	x	x	x	x
incertae	Gocevia	Gocevia	JF694281	JF694306	x	x	x	x
Acramoebidae	Grellamoeba robusta	Grellamoeba	GQ438740	none		x	x	x	x	x
Hartmannelidae	Hartmannela cantabrigiensis	Hartmcanta	AY294147	AY294158	x	x	x	x	x	x
Echinamoebidae	Hartmannela vermiformis	Hartmverm	AF426157	HVL00000035	x	x	x	x	x	x
Hartmannelidae	Hartmannella 243D10	Hartma243D10	AY680841	none			x	x	x	x
incertae	Hartmannella abertawensis	Hartmaberta	DQ190241	none		x	x	x	x	x
Arcellinida	Heleopera rosea	Heleorosea	EU392157	none		x	x	x	x	x
Arcellinida	Heleopera sphagni	Heleosphagni	AY848964	AY848971	x	x	x	x	x	x
Outgroup	Homo sapiens	Homosapiens	NR_003286	BC012597	x	x	x	x	x	x
Arcellinida	Hyalosphenia elegans	Hyaloelegans	EU392154	none		x	x	x	x	x
Arcellinida	Hyalosphenia papilio Hbog	HyalopapilioHbog	JF694282	JF694311	x	x	x	x	x	x
incertae	Isolate CHINC-5 (ATCC 50979)	Sexangularia	none	JF694319		x	x	x
Dactylopodida	Korotnevella hemistylolepis	Korohemisty	AY121850	none		x	x	x	x	x
Leptomyxidae	Leptomyxa reticulata	Leptoret	AF293898	none		x	x	x	x	x
Myxogastrida	Lindbladia tubulina	Lindbladia	FJ810500	none			x		x
Vanellidae	Lingulamoeba leei	Lingulamoeba	AY183886	none			x	x	x	x
Archamoebida	Mastigamoeba balamuthi 50617	Mastigabal50617	AF421220	ABV60082	x	x	x	x	x	x
Archamoebida	Mastigamoeba simplex	Mastigasimplex	AF421218	none			x	x	x	x
Archamoebida	Mastigella commutans	Mastigella	AF421219	none		x	x	x	x	x
incertae	Mayorella	Mayorella	AY294143	AY294152	x	x	x	x	x	x
Mayorellidae	Mayorella gemmifera	Mayorgem	EU719190	none		x	x	x	x	x
Outgroup	Ministeria vibrans	Ministeria	AF271998	AY582846	x	x	x	x	x	x
Outgroup	Monosiga brevicolis	Monosigabrevi	AF084618	AY026072	x	x	x	x	x	x
incertae	Multicilia marina	Multicilia	AY268037	none		x	x	x	x	x
Arcellinida	Nebela carinata	Nebcar01	EU392144	none		x	x	x	x	x
Arcellinida	Nebela carinata Hbog	NebcarHbog	JF694283	JF694312	x	x	x	x	x	x
Arcellinida	Nebela lageniformis	Neblagen	EU392155	none		x	x	x	x	x
Arcellinida	Nebela tincta	Nebtinctamajor01	AY848968	none		x	x	x	x	x
Schizoplasmodiida	Nematostelium ovatum	Nematostelium	FJ544420	none			x	x	x	x
Outgroup	Nematostella vectensis	Nematostella	AF254382	XM_001637026	x	x	x	x	x	x
Dactylopodida	Neoparamoeba branchiphila	Neoparamoeba	EF675603	none			x	x	x	x
incertae	Nolandella 50913	Nolandella50913	EU273451	EU273446	x	x	x	x	x	x
incertae	Nolandella PRA27	NolandellaPRA27	EU273456	EU273453	x	x	x	x	x	x
Outgroup	Nuclearia simplex	Nuclearia	AF349566	AY305012	x	x	x	x	x	x
Leptomyxidae	Paraflabellula hoguae	Paraflabhoguae	AF293899	JF694314	x	x	x	x	x	x
Leptomyxidae	Paraflabellula reniformis	Paraflabrenif	AF293900	none			x	x	x	x
Dactylopodida	Paramoeba eilhardi	Paramoeba	AY686575	none			x	x	x	x
incertae	Parvamoeba monoura (Thecasp)	Parvamoeba	EF455775	EF459773	x	x	x	x	x	x
Pelobiontida	Pelomyxa palustris	Pelpalustris	AY294156	AY294156	x	x	x		x
incertae	Pessonella	Pessonella	EU273458	EU273457	x	x	x	x
incertae	Phalansterium solitarium	Phalansterium	AF280078	AAU43213	x	x	x	x	x	x
Myxogastrida	Physarum polycephalum	Physapoly	X13160	P02576	x	x	x		x
Vanellidae	Platyamoeba placida	Platyplacida	AY294150	AY294153	x	x	x	x	x	x
Dictyosteliida	Polysphondylium pallidum	Polysphondylium	AY040338	EFA79618	x	x	x		x
Arcellinida	Porosia bigibbosa	Porosiabig	EU392147	none		x	x	x	x	x
Acanthamoebida	Protacanthamoeba bohemica	Protacanthamoeba	AY960120	none			x	x	x	x
Myxogastrida	Protophysarum phloiogenum	Protophysarum	AY230189	none			x		x
Protosporangiida	Protosporangium articulatum	Protosporangium	FJ792705	none		x	x	x	x	x
Vanellidae	Protosteliopsis fimicola	Protosteliopsis	FJ766470	none		x	x	x	x	x
Protosteliida	Protostelium mycophagum	Protosmycophagum	FJ766466	none			x	x	x	x
Protosteliida	Protostelium nocturnum	Protosnocturnum	FJ766468	none			x	x	x	x
Protosteliida	Protostelium okumukumu	Protosokumukumu	FJ766482	none		x	x	x	x	x
Acanthamoebida	Protosteloid isolate LHI05	ProtostelialesLHI05	FJ792702	none		x	x	x	x	x
Arcellinida	Pyxidicula operculata	Pyxidicula	JF694284	JF694316	x	x	x	x	x	x
Leptomyxidae	Rhizamoeba 50933	Rhiza50933	EU273463	EU273459	x	x	x	x	x	x
Leptomyxidae	Rhizamoeba neglecta	Rhizaneglecta	FJ844435	none			x	x	x	x
Leptomyxidae	Rhizamoeba saxonica 50742	Rhizasaxonica50742	AY121847	none		x	x	x	x	x
Leptomyxidae	Ripidomyxa RP010	RipidomyxaRP010	AY549564	none		x	x	x	x	x
Hartmannellidae	Saccamoeba lacustris	Saccalacus	GQ221845	none			x	x	x	x
Hartmannelidae	Saccamoeba limax (ATCC 30942)	Saccalimax	AF293902	none		x	x	x	x	x
Hartmannellidae	Saccamoeba NTSHR	SaccamoebaNTSHR	EU869301	none		x	x	x	x	x
Outgroup	Saccharomyces cerevisae S288c	Saccharomyces	285813361:455934-457733	NM_001179927.1	x	x	x	x	x	x
Outgroup	Salpingoeca amphoridium	Salpingoeca	DQ059032	DQ059029	x	x	x	x	x	x
Thecamoebidae	Sappinia diploidea	Sappiniadiploidea	DQ122380	none		x	x	x	x	x
Thecamoebidae	Sappinia pedata	Sappipedata	EU004594	EU004601	x	x	x	x	x	x
Cavosteliida	Schizoplasmodiopsis amoeboidea	Schizoplasmodiopsis	FJ766477	none		x	x	x	x	x
Schizoplasmodiida	Schizoplasmodium cavostelioides	Schizoplasmodium	FJ544418	none			x	x	x	x
Soliformoviida	Soliformovum expulsum	Soliformoexpulsum	FJ766479	none			x	x	x	x
Soliformoviida	Soliformovum irregulare	Soliforirregulare	FJ766480	none		x	x	x	x	x
Arcellinida	Spumochlamys bryora 1901	Spumobryora1901	FJ705341	FJ705345	x	x	x	x	x	x
Arcellinida	Spumochlamys perforata 2504	Spumoperforata2504	FJ705341	FJ705344	x	x	x	x	x	x
Myxogastrida	Stemonitis flavogenita	Stemonitis	AF239229	none			x	x	x	x
Incertae	Stenamoeba CRIB68	StenamoebaCRIB68	EU377587	none		x	x	x	x	x
Thecamoebidae	Stenamoeba stenopodia (Platyamoeba)	StenaStenopodia	AY294144	none			x	x	x	x
incertae	Stereomyxa ramosa	Stereomyxa	none	JF694321		x	x	x	x	x
Stygamoebidae	Stygamoeba regulata	Stygamoeba	JF694285	JF694322	x	x	x	x	x	x
Myxogastrida	Symphytocarpus impexus	Symphytocarpus	AY230188	none			x	x	x	x
Thecamoebidae	Thecamoeba (ATCC 50185)	Theca50185	JF694286	JF694323	x	x	x	x	x	x
Thecamoebidae	Thecamoeba quadrilineata	Thecaquadrilineata	DQ122381	none			x	x	x	x
Thecamoebidae	Thecamoeba similis	Thecasimilis	AY294145	AY294154	x	x	x	x	x	x
Myxogastrida	Trichia persimilis	Trichia	AY643826	none		x	x		x
incertae	Trichosphaerium	Trichosphaerium	EU273471	EU273466	x	x	x
Arcellinida	Trigonopyxis arcula	Trigoarcula	AY848967	none		x	x	x	x	x
Cavosteliida	Tychosporium acutostipes	Tychosporium	FJ792704	none			x	x	x	x
Vanellidae	Vannella anglica	Vannellaanglica	AF099101	none			x	x	x	x
Vanellidae	Vannella CAZ6/I	VannellaCAZ6	AY929914	none			x	x	x	x
Vanellidae	Vannella ebro	Vanneebro	AF486084	AY294151	x	x	x	x	x	x
Stygamoebidae	Vermistella antarctica	Vermistella	DQ229956	none		x	x	x	x	x
Dactylopodida	Vexillifera armata	Vexillarmata	AY183891	none			x	x	x	x
Dactylopodida	Vexillifera minutissima	Vexillminuti	AY294149	none			x	x
